# Supplementary material
Source: publisher figshare collection journal article supplement (https://acs.figshare.com/ndownloader/files/5834580)
Supplement: Supplementary file 1 [file 5834580]

## Supporting Information for *Organic Letters*

### Dicobalt Octacarbonyl-Promoted Rearrangement of 4-Isoxazolines to Acylaziridines: Establishment of Dramatic Rate Acceleration with Very High Substrate Tolerance

Teruhiko Ishikawa,\* Takayuki Kudo, Juri Yoshida, Ayako Yasuhara, Shinobu Manabe, and Seiki Saito\*

*Department of Bioscience and Biotechnology, Faculty of Engineering, Okayama University, Tsushima, Okayama, Japan 700-8530*

#### Experimental Section

**General.** IR spectra were recorded on a Horiba Fourier transform infrared spectrophotometer Model FT-210 instrument and only typical absorptions were cited.  $^1\text{H}$  NMR and  $^{13}\text{C}$  NMR spectra were recorded on a Varian VXR-200 (200 MHz for proton and 50 MHz for carbon-13), Varian Mercury-300 (300 MHz for proton and 75 MHz for carbon-13) instrument. The chemical shifts are given in  $\delta$  unit relative to internal  $\text{CHCl}_3$  (7.26 ppm for  $^1\text{H}$ ) or  $\text{CDCl}_3$  (77 ppm for  $^{13}\text{C}$ ). All NMR experiments were performed using deuteriochloroform as a solvent unless otherwise indicated.  $^1\text{H}$  NMR spectral data were indicated in the form:  $\delta$  value of signal (peak multiplicities, integrated number of protons, and coupling constant (if any)). The peak multiplicities are abbreviated as follows: s, singlet; d, doublet; t, triplet; q, quartet; m, multiplet; br, broad. Analytical thin layer chromatography was performed on Merck pre-coated silica gel 60 F-254 (0.25 mm thickness). Elemental analyses were made with a Perkin-Elmer 2400 CHN Elemental Analyzer. All reactions, unless otherwise noted, were conducted under nitrogen or argon atmosphere. Liquid reagents were transferred via a dry hypodermic syringe from sure seal bottles to a reaction flask through a rubber septum wired onto the reaction flask. The septum can also serve to permit evacuation to eliminate air and introduce the inert gas by means of a steady stream of inert gas flowing system. Organic extracts were concentrated by evaporation with a rotary evaporator evacuated at around 60 mmHg. Column chromatography, unless otherwise specified, was performed on a Merck silica gel 60 7734 using an appropriate ratio of ethyl acetate (AcOEt)-hexane mixed solvent and abbreviated as CC.

**Materials.** Unless otherwise noted, materials were obtained from commercial suppliers and

reagent grade materials were used without further purification. Dimethylformamide (DMF), acetonitrile (MeCN), toluene, dichloromethane ( $\text{CH}_2\text{Cl}_2$ ), and triethylamine ( $\text{Et}_3\text{N}$ ) were freshly distilled from  $\text{CaH}_2$  prior to use. Tetrahydrofuran (THF) purchased from Kanto Chemical Co., Inc is dehydrated and stabilizer-free grade and was used as received.

**General Procedure for the Preparation of 4-isoxazoline Derivatives (1a—1d).** To a solution of a nitron (2.9 mmol) in toluene (5 mL) was added phenylacetylene (5.8 mmol, 2.0 eq). The reaction mixture was heated at 75 °C for 8 h and was concentrated to afford a crude residue, which was purified by CC to give a 4-isoxazoline: for the synthesis of every substrate only one or two runs were conducted, and the yields were not optimized yet.

**2-Benzyl-3-isopropyl-5-phenyl-4-isoxazoline (1a).** 63% yield; IR (film) 2958, 1495, 1276, 1024  $\text{cm}^{-1}$ ;  $^1\text{H}$  NMR  $\delta$  0.91 (d, 6H,  $J = 6.9$  Hz,  $(\text{CH}_3)_2\text{C}$ ), 1.72 (dq, 1H,  $J = 6.6$  Hz, 6.9 Hz,  $(\text{CH}_3)_2\text{CH}$ ), 3.71 (dd, 1H,  $J = 2.8$  Hz, 6.6 Hz, NCH), 3.89 and 4.30 (ABq, 2H,  $J = 12.6$  Hz,  $\text{PhCH}_2\text{N}$ ), 5.34 (d, 1H,  $J = 2.8$  Hz, OCCH), 7.28–7.59 (m, 10H, Ar-H);  $^{13}\text{C}$  NMR  $\delta$  18.3, 18.7, 33.7, 63.8, 76.5, 93.7, 125.5, 127.4, 128.2, 128.3, 128.7, 129.8, 132.0, 136.7, 152.4.

**2-Benzyl-3,5-diphenyl-4-isoxazoline (1b).** 33% yield; IR (KBr) 1495, 1020, 725  $\text{cm}^{-1}$ ;  $^1\text{H}$  NMR  $\delta$  4.14 and 4.47 (ABq, 2H,  $J = 12.6$  Hz,  $\text{PhCH}_2\text{N}$ ), 5.08 (d, 1H,  $J = 3.0$  Hz, BnNCH), 5.46 (d, 1H,  $J = 3.0$  Hz, OC=CH), 7.24–7.65 (m, 15H, Ar-H);  $^{13}\text{C}$  NMR  $\delta$  63.4, 73.5, 95.7, 125.7, 127.1, 127.5, 128.3, 128.4, 128.5, 128.7, 129.0, 129.6, 130.0, 136.3, 142.0, 152.8.

**2-Benzyl-3-(4-methoxy)phenyl-5-phenyl-4-isoxazoline (1c).** 13% yield; IR (film) 1609, 1511, 1448, 1303  $\text{cm}^{-1}$ ;  $^1\text{H}$  NMR  $\delta$  3.79 (s, 3H, MeO), 4.13 and 4.45 (ABq, 2H,  $J = 12.6$  Hz,  $\text{PhCH}_2\text{N}$ ), 5.05 (d, 1H,  $J = 2.5$  Hz, BnNCH), 5.43 (d, 1H,  $J = 2.5$  Hz, OC=CH), 6.81–7.64 (m, 14H, Ar-H);  $^{13}\text{C}$  NMR  $\delta$  55.2, 63.2, 73.1, 95.8, 113.8, 125.7, 127.5, 128.1, 128.3, 128.7, 129.0, 129.6, 134.1, 136.4, 152.7, 159.0.

**2-Benzyl-3-heptyl-5-phenyl-4-isoxazoline (1d).** 50% yield;  $^1\text{H}$  NMR  $\delta$  0.88 (t, 3H,  $J = 6.6$  Hz, Me), 1.05–2.80 (m, 12H,  $\text{CH}_3(\text{CH}_2)_6\text{CH}$ ), 3.88 and 4.29 (ABq, 2H,  $J = 12.4$  Hz,  $\text{PhCH}_2\text{N}$ ), 3.92 (m, 1H, BnNCH), 5.31 (d, 1H,  $J = 2.8$  Hz, OC=CH), 7.28–7.57 (m, 10H, Ar-H);  $^{13}\text{C}$  NMR  $\delta$  14.1, 22.6, 25.7, 29.3, 29.4, 31.8, 36.3, 63.2, 70.2, 95.8, 125.5, 127.4, 128.3, 128.7, 129.0, 129.7, 136.6, 152.1.

**2-Benzyl-3,3-dimethyl-5-phenyl-4-isoxazoline (1e).** To a solution of acetone (4.0 mL) in toluene (4.0 mL) was added *N*-benzylhydroxylamine (220 mg, 1.79 mmol). The reaction mixture was stirred at 70 °C for 1 h. To the reaction was added phenylacetylene (0.59 mL, 5.37 mmol, 3.0 eq), and the mixture was heated at 75 °C for 21 h and concentrated to afford a crude residue, which was purified by CC to give isoxazoline **1e** (61 mg, 13 %) as a colorless oil. <sup>1</sup>H NMR δ 1.41 (s, 6H, *MeMeC*), 4.02 (s, 2H, PhCH<sub>2</sub>N), 5.32 (s, 1H, OC=CH), 7.25–7.50 (m, 10H, Ar-H); <sup>13</sup>C NMR δ 25.5, 56.0, 68.8, 76.6, 103.6, 125.3, 127.0, 128.2, 128.3, 128.6, 129.2, 138.2, 151.6.

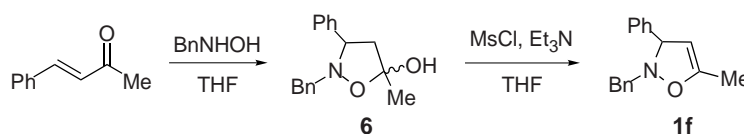

**2-Benzyl-5-methyl-3-phenyl-4-isoxazoline (1f).** To a solution of benzalacetone (315 mg, 2.15 mmol) in THF (7 mL) was added *N*-benzylhydroxylamine (217 mg, 1.76 mmol). The reaction mixture was stirred at room temperature for 6 h and concentrated to afford a crude residue, which was purified by CC to give isoxazolidine **6** (382 mg, 1.42 mmol, 81 %) as a colorless oil. To a solution of **6** (205 mg, 0.76 mmol) in THF (5 mL) were added Et<sub>3</sub>N (0.33 mL, 2.33 mmol) and methanesulfonyl chloride (0.09 mL, 1.16 mmol) at 0 °C. The mixture was stirred at 0 °C for 20 min followed by the addition of water. The mixture was extracted with AcOEt, and the combined organic solutions were dried with Na<sub>2</sub>SO<sub>4</sub> and concentrated to give an oil, which, on CC, gave isoxazoline **1f** (133 mg, 84 % conv.) as a colorless oil. <sup>1</sup>H NMR δ 1.90 (s, 3H, OCM*e*), 4.07 and 4.34 (ABq, 2H, *J* = 13.0 Hz, PhCH<sub>2</sub>N), 4.67 (br, 1H, PhCH), 4.87 (br, 1H, OC=CH), 7.2–7.4 (m, 10H, Ar-H); <sup>13</sup>C NMR δ 11.6, 63.4, 73.3, 95.8, 126.9, 127.3, 127.4, 128.3, 128.3, 129.4, 136.6, 142.7, 151.4.

**General Procedure for the Preparation of 4-isoxazoline Derivatives (1g, h).** A solution of a nitron (1.13 mmol) in bis(trimethylsilyl)acetylene (5.73 mmol, 5.0 eq) was heated at 100 °C for 4 h. The mixture was concentrated *in vacuo* to afford a crude residue, which was purified by CC to give an oil: the yields were not optimized yet.

**2-Benzyl-3-phenyl-4,5-bis(trimethylsilyl)-4-isoxazoline (1g).** 70% yield; IR (film) 2957, 1250, 842 cm<sup>-1</sup>; <sup>1</sup>H NMR δ 0.00 (s, 9H, SiMe<sub>3</sub>), 0.33 (s, 9H, SiMe<sub>3</sub>), 3.82 and 4.16 (ABq, 2H, *J* = 12.6 Hz, PhCH<sub>2</sub>N), 4.80 (s, 1H, PhCH), 6.95–7.40 (m, 10H, Ar-H); <sup>13</sup>C NMR

$\delta$  -0.6, 0.8, 62.6, 77.5, 116.3, 127.3, 127.6, 128.2, 128.3, 129.7, 136.6, 142.0, 161.7.

**2-Benzyl-3-isopropyl-4,5-bis(trimethylsilyl)-4-isoxazoline (1h).** 87% yield; IR (film) 2958, 1565, 1250, 1073, 832  $\text{cm}^{-1}$ ;  $^1\text{H}$  NMR  $\delta$  0.16 (s, 9H,  $\text{SiMe}_3$ ), 0.24 (s, 9H,  $\text{SiMe}_3$ ), 0.70 (d, 3H,  $J = 6.9$  Hz,  $(\text{CH}_3)_2\text{C}$ ), 0.71 (d, 3H,  $J = 6.6$  Hz,  $(\text{CH}_3)_2\text{C}$ ), 1.35–1.50 (m, 1H,  $(\text{CH}_3)_2\text{CH}$ ), 3.57 and 3.95 (ABq, 2H,  $J = 12.1$  Hz,  $\text{PhCH}_2\text{N}$ ), 3.70 (d, 1H,  $J = 2.5$  Hz,  $\text{BnNCH}$ ), 7.22–7.37 (m, 5H, Ar-H);  $^{13}\text{C}$  NMR  $\delta$  -0.7, 1.0, 14.9, 20.0, 31.8, 62.7, 78.4, 114.6, 127.2, 128.1, 130.1, 136.7, 161.5.

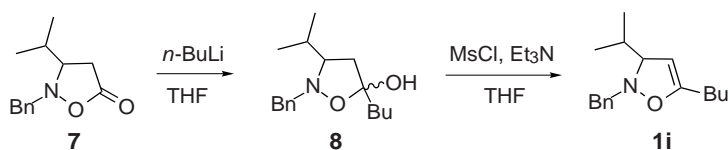

**2-Benzyl-5-butyl-3-isopropyl-4-isoxazoline (1i).** To a solution of isoxazolidinone **7** (402 mg, 1.84 mmol) in THF (10 mL) was added  $n\text{-BuLi}$  (1.6 M solution in hexane, 1.25 mL, 1.1 equiv) at  $-78$   $^\circ\text{C}$ , and the mixture was stirred at  $-78$   $^\circ\text{C}$  to room temperature for 7 h. The reaction mixture was quenched by the addition of water and extracted with AcOEt. The combined organic solutions were dried with  $\text{Na}_2\text{SO}_4$  and concentrated to give an oil, which, on CC, gave isoxazolidine **8** (191 mg, 38 %) and unchanged **7** (73 mg, 18 %). To a solution of **8** (176 mg, 0.63 mmol) in THF (5 mL) were added  $\text{Et}_3\text{N}$  (0.26 mL, 3.0 equiv) and methanesulfonyl chloride (0.07 mL, 1.5 equiv) at  $0$   $^\circ\text{C}$ . The reaction was stirred at  $0$   $^\circ\text{C}$  to room temperature for 1 h followed by the addition of water. The mixture was extracted with AcOEt, and the combined organic solutions were dried with  $\text{Na}_2\text{SO}_4$  and concentrated to give an oil, which, on CC, gave isoxazoline **1i** (60 mg, 37 %) as a colorless oil and unchanged **8** (46 mg, 26 %).  $^1\text{H}$  NMR  $\delta$  0.81 (d, 6H,  $J = 6.9$  Hz,  $(\text{CH}_3)_2\text{C}$ ), 0.93 (t, 3H,  $J = 7.4$  Hz,  $\text{CH}_2\text{CH}_3$ ), 1.20–1.58 (m, 5H,  $\text{CH}_2\text{CH}_3$ ,  $\text{CH}_2\text{CH}_2\text{CH}_3$ ,  $(\text{CH}_3)_2\text{CH}$ ), 2.06–2.11 (m, 2H,  $\text{OCCH}_2$ ), 3.40 (m, 1H,  $\text{NCH}$ ), 3.77 and 4.14 (ABq, 2H,  $J = 12.6$  Hz,  $\text{PhCH}_2\text{N}$ ), 4.44 (m, 1H,  $\text{OCH}=\text{C}$ ) 7.18–7.40 (m, 5H, Ar-H);  $^{13}\text{C}$  NMR  $\delta$  13.8, 18.2, 18.5, 22.2, 25.7, 29.0, 33.8, 63.9, 76.0, 92.3, 127.2, 128.1, 129.6, 137.0, 155.0.

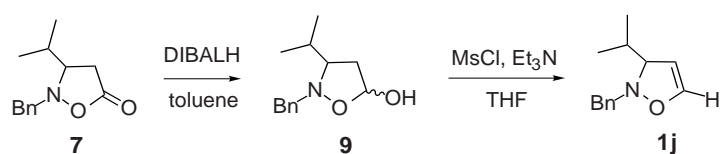

**2-Benzyl-3-isopropyl-4-isoxazoline (1j).** To a solution of isoxazolidinone **7** (527 mg,

2.40 mmol) in THF (10 mL) was added DIBAL-H (1.0 M solution in toluene, 2.6 mL, 1.1 equiv) at  $-78\text{ }^{\circ}\text{C}$ , and the mixture was stirred at  $-78\text{ }^{\circ}\text{C}$  for 30 min. The reaction was quenched by the addition of water and filtered through a celite pad, the filter cake being thoroughly rinsed with AcOEt. The combined organic solutions were dried with  $\text{Na}_2\text{SO}_4$  and concentrated to give an oil, which, on CC, gave isoxazolidine **9** (442 mg, 83 %). To a solution of **9** (418 mg, 1.78 mmol) in THF (10 mL) was added  $\text{Et}_3\text{N}$  (0.75 mL, 3.0 equiv) and methanesulfonyl chloride (0.20 mL, 1.5 equiv) at  $0\text{ }^{\circ}\text{C}$ . The reaction was stirred at  $0\text{ }^{\circ}\text{C}$  to room temperature for 1 h followed by the addition of water. The mixture was extracted with AcOEt, and the combined organic solutions were dried with  $\text{Na}_2\text{SO}_4$  and concentrated to give an oil, which, on CC, gave isoxazoline **1j** (172 mg, 48 %) and unchanged **9** (155 mg, 37 %).  $^1\text{H}$  NMR  $\delta$  0.83 (d, 3H,  $J = 1.7\text{ Hz}$ ,  $(\text{CH}_3)_2\text{C}$ ), 0.85 (d, 3H,  $J = 1.7\text{ Hz}$ ,  $(\text{CH}_3)_2\text{C}$ ), 1.50–1.63 (m, 1H,  $(\text{CH}_3)_2\text{CH}$ ), 3.55–3.58 (m, 1H,  $(\text{CH}_3)_2\text{CCH}$ ), 3.79 and 4.15 (ABq, 2H,  $J = 12.9\text{ Hz}$ ,  $\text{PhCH}_2\text{N}$ ), 4.88 (m, 1H,  $\text{OC}=\text{CH}$ ), 6.45 (m, 1H,  $\text{OCH}=\text{C}$ ) 7.24–7.45 (m, 5H, Ar-H);  $^{13}\text{C}$  NMR  $\delta$  18.1, 18.4, 33.5, 63.8, 74.9, 97.5, 127.3, 128.2, 129.3, 136.8, 141.5.

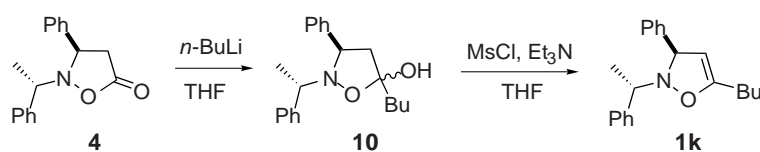

**(3R)-5-Butyl-3-phenyl-2-[(1S)-1-phenyl]ethyl-4-isoxazoline (1k).** To a solution of isoxazolidinone **4** (110 mg, 0.41 mmol) in THF (3.0 mL) was added  $n\text{-BuLi}$  (1.56 M solution in hexane, 0.4 mL, 1.5 equiv) at  $-40\text{ }^{\circ}\text{C}$  and the mixture was stirred at  $-45\text{ }^{\circ}\text{C}$  to room temperature for 1.5 h. The reaction was quenched by the addition of water and extracted with AcOEt. The combined organic solutions were dried with  $\text{Na}_2\text{SO}_4$  and concentrated to give an oil, which, on CC, gave the mixture of **4** and **10** (95 mg). To a solution of **4** and **10** (95 mg) in THF (5 mL) was added  $\text{Et}_3\text{N}$  (0.33 mL, 2.33 mmol) and methanesulfonyl chloride (0.09 mL, 1.16 mmol) at  $0\text{ }^{\circ}\text{C}$ . The reaction was stirred at  $0\text{ }^{\circ}\text{C}$  for 20 min followed by the addition of water and extracted with AcOEt. The combined organic solutions were dried with  $\text{Na}_2\text{SO}_4$  and concentrated to give an oil, which, on careful CC, gave isoxazoline **1k** (28 mg, 22 % for 2 steps) as a colorless oil and unchanged **4** (17 mg, 16 %).  $[\alpha]_{\text{D}}^{28} +253$  (c 0.730,  $\text{CHCl}_3$ );  $^1\text{H}$  NMR  $\delta$  0.96 (t, 3H,  $J = 7.4\text{ Hz}$ ,  $\text{CH}_2\text{CH}_3$ ), 1.56 (d, 3H,  $J = 6.3\text{ Hz}$ ,  $\text{PhMeCH}$ ), 1.37–1.48 (m, 4H,  $(\text{CH}_2)_2\text{CH}_3$ ), 2.26–2.31 (m, 2H,  $\text{CH}_2(\text{CH}_2)_2\text{CH}_3$ ), 4.07–4.13 (m, 2H,  $\text{PhCHMe}$ ), 4.59–4.60 (m, 1H,  $\text{OC}=\text{CH}$ ), 4.74 (br,

<sup>1</sup>H, NCH), 6.94–7.35 (m, 10H, Ar-H); <sup>13</sup>C NMR δ 13.8, 21.8, 22.4, 25.7, 29.2, 67.2, 71.7, 95.0, 126.9, 127.0, 127.5, 128.2, 128.3, 128.4, 142.4, 143.1, 155.4.

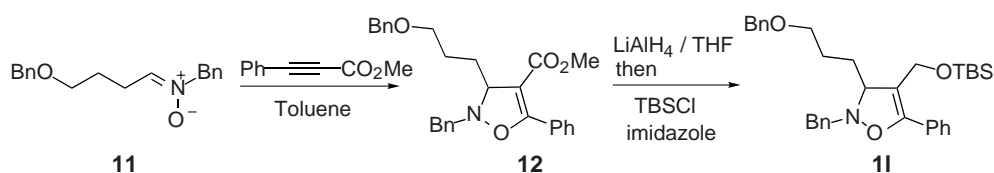

**2-Benzyl-3-(3-benzyloxy)propyl-4-(*tert*-butyldimethylsilyloxy)methyl-5-phenyl-4-isoxazoline (11).** A solution of nitrone **11** (501 mg, 1.77 mmol) and methyl 3-phenylpropiolate (1.28 g, 5.0 equiv) in toluene (3 mL) was heated at 75 °C for 2 h. The mixture was concentrated to afford a crude residue, which was purified by CC to give isoxazoline **12** (699 mg, 89%). To a solution of **12** (274 mg, 0.618 mol) in THF (14 mL) was added LiAlH<sub>4</sub> (29 mg, 1.0 equiv) at room temperature and the mixture was stirred at room temperature for 1 h. The reaction was quenched by the addition of water and filtered through a celite pad, the filter cake being thoroughly rinsed with AcOEt. The combined organic solutions were dried with Na<sub>2</sub>SO<sub>4</sub> and concentrated to give an oil, which, on CC, gave an alcohol (250 mg, 97 %). To a solution of the alcohol (95 mg, 0.23 mol) in THF (2 mL) was added imidazole (71 mg, 4.0 equiv) and *tert*-butyldimethylsilyl chloride (70 mg, 2.0 equiv) at 0 °C. The mixture was stirred at 0 °C to room temperature for 4.5 h followed by the addition of water. The mixture was extracted with AcOEt, and the combined organic solutions were dried with Na<sub>2</sub>SO<sub>4</sub> and concentrated to give an oil, which, on CC, gave isoxazoline **11** (118 mg, 97 %). <sup>1</sup>H NMR δ 0.07 (s, 6H, *tert*-BuSiMe<sub>2</sub>), 0.93 (s, 9H, (CH<sub>3</sub>)<sub>3</sub>CSi), 1.5–1.8 (m, 4H, BnOCH<sub>2</sub>CH<sub>2</sub>CH<sub>2</sub>), 3.3–3.5 (m, 2H, BnOCH<sub>2</sub>), 3.88 and 4.30 (ABq, 2H, *J* = 12.4 Hz, PhCH<sub>2</sub>N), 4.02 (m, 1H, NCH), 4.38 and 4.46 (ABq, 2H, *J* = 12.1 Hz, CH<sub>2</sub>OTBS), 4.40 (s, 2H, PhCH<sub>2</sub>O), 7.23–7.51 (m, 15H, Ar-H); <sup>13</sup>C NMR δ –5.3, –5.4, 18.2, 25.7, 25.8, 30.4, 56.7, 62.6, 71.2, 70.9, 72.7, 109.6, 127.3, 127.4, 127.5, 127.8, 128.21, 128.25, 128.9, 129.2, 129.7, 136.5, 138.6, 148.0.

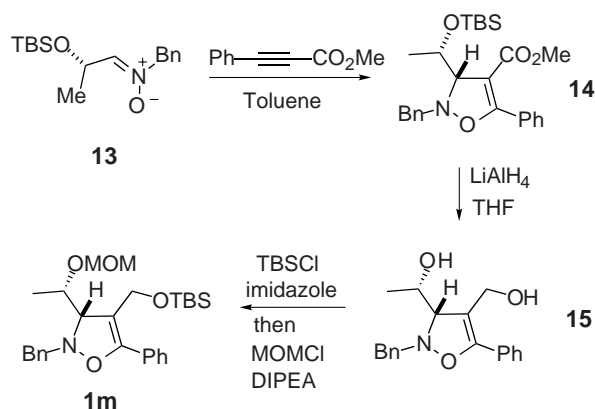

**(3*S*)-2-Benzyl-4-(*tert*-butyldimethylsilyloxy)methyl-3-[(1*S*)-1-(methoxy-methoxy)ethyl]-5-phenyl-4-isoxazoline (1m).** A solution of nitrone **13** (560 mg, 2.05 mmol) and methyl 3-phenylpropiolate (655 mg, 2.0 equiv) in toluene (3 mL) was heated at 75 °C for 2 h. The mixture was concentrated to afford a crude residue, which was purified by CC to give isoxazoline **14** (661 mg, 71 %) as a mixture of diastereomers (major : minor = 9 : 1). To a solution of **14** (160 mg, 0.35 mmol) in THF (3 mL) was added LiAlH<sub>4</sub> (40 mg, 3.0 equiv) at room temperature, and the mixture was stirred at room temperature for 1 h. The reaction was quenched by the addition of water and filtered through a celite pad, the filter cake being thoroughly rinsed with AcOEt. The combined organic solutions were dried with Na<sub>2</sub>SO<sub>4</sub> and concentrated to give an oil, which, on CC, gave diol **15** (89 mg, 81 %) as a mixture of separable diastereomers. Data for **15** (major isomer): <sup>1</sup>H NMR δ 1.22 (d, 3H, *MeCH*), 3.20–3.55 (br, 2H, *CH*<sub>2</sub>*OH*, *MeCHOH*), 3.84–3.78 (m, 1H, *MeCH*), 3.92 and 4.29 (ABq, 2H, *J* = 12.9 Hz, *PhCH*<sub>2</sub>*N*), 4.01 (d, 1H, *J* = 4.4 Hz, *NCH*), 4.22 and 4.41 (ABq, 2H, *J* = 12.4 Hz, *CH*<sub>2</sub>*OH*), 4.63 and 4.60 (ABq, 2H, *J* = 6.9 Hz, *MeOCH*<sub>2</sub>), 7.25–7.61 (m, 10H, *Ar-H*); <sup>13</sup>C NMR δ 17.8, 57.0, 63.3, 69.4, 77.1, 104.3, 127.7, 128.0, 128.2, 128.4, 128.5, 129.4, 129.6, 129.7, 135.9, 151.8.

The absolute configurations of the each diastereomers of diol **15** were determined by careful analysis of <sup>1</sup>H NMR including *J*-value.

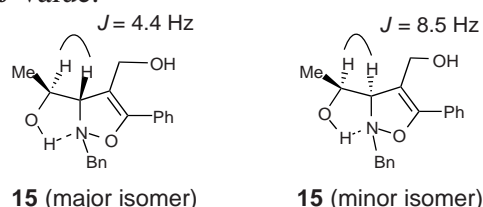

To a solution of **15** (72 mg, 0.23 mmol) in THF (3 mL) were added imidazole (125 mg, 8.0 equiv) and *tert*-butyldimethylsilyl chloride (139 mg, 4.0 equiv) at 0 °C and the mixture was stirred at 0 °C to room temperature for 2.5 h. The reaction was quenched by the addition of water and



extracted with AcOEt. The combined organic solutions were dried with Na<sub>2</sub>SO<sub>4</sub> and concentrated to give an oil, which, on CC, gave an alcohol (45 mg, 46 %). To a solution of the alcohol (165 mg, 0.39 mmol) in THF (5.5 mL) were added *N,N*-diisopropylethylamine (0.8 mL, 12.0 equiv) and chloromethyl methyl ether (0.18 mL, 6.0 equiv) at 0 °C. The mixture was stirred at 40 °C for 24 h. The reaction was quenched by the addition of water and extracted with AcOEt. The combined organic solutions were dried with Na<sub>2</sub>SO<sub>4</sub> and concentrated to give an oil, which, on CC, gave isoxazoline **1m** (133 mg, 73 %) as a colorless oil.  $[\alpha]_{\text{D}}^{28} -107$  (c 1.68, CHCl<sub>3</sub>); <sup>1</sup>H NMR  $\delta$  0.05 (s, 6H, *tert*-BuSiMe<sub>2</sub>), 0.91 (s, 9H, (CH<sub>3</sub>)<sub>3</sub>CSi), 3.26 (s, 3H, MeO), 3.76 (m, 1H, MeCH), 3.87 and 4.33 (ABq, 2H, *J* = 12.4 Hz, PhCH<sub>2</sub>N), 4.06 (m, 1H, NCH), 4.42 and 4.46 (ABq, 2H, *J* = 12.1 Hz, CH<sub>2</sub>OTBS), 4.63 and 4.60 (ABq, 2H, *J* = 6.9 Hz, MeOCH<sub>2</sub>), 7.2–7.6 (m, 10H, Ar-H); <sup>13</sup>C NMR  $\delta$  –5.4, –5.2, 16.4, 18.3, 25.9, 55.2, 57.0, 63.3, 74.2, 74.4, 95.4, 106.1, 127.6, 127.9, 128.2, 128.3, 128.3, 129.1, 129.9, 136.1, 150.2.

**General Procedure for Cobalt Octacarbonyl-Promoted Rearrangement Reactions.** To a solution of a 4-isoxazoline (0.410 mmol) in MeCN (8 mL) was added dicobalt octacarbonyl (0.205 mmol, 0.5 eq). The brown solution was stirred at room temperature for 5 min, and the reaction vessel was immersed into an oil bath heated at 75 °C, stirring being continued for 0.5–1.0 h. The solution was left in contact with air for a few hours to induce decomposition of the cobalt reagent. The resulting precipitate was filtered through a celite pad and the filter cake was washed several times with AcOEt. The combined filtrates were concentrated to give an oil, which was purified by CC to give 2-acylaziridines **2** and **3**.

**(2*S*\*,3*S*\*)-2-Benzoyl-1-benzyl-3-(isopropyl)aziridine (2a).** 41% yield (35 mg); IR (KBr) 2955, 1676, 1450, 1228 cm<sup>–1</sup>; <sup>1</sup>H NMR  $\delta$  0.70 (d, 3H, *J* = 6.9 Hz (CH<sub>3</sub>)<sub>2</sub>C), 0.91 (d, 3H, *J* = 6.6 Hz, (CH<sub>3</sub>)<sub>2</sub>C), 1.4–1.6 (m, 1H, (CH<sub>3</sub>)<sub>2</sub>CH), 1.92 (dd, 1H, *J* = 6.9 Hz, 9.6 Hz, (CH<sub>3</sub>)<sub>2</sub>CCH), 3.13 (d, 1H, *J* = 6.9 Hz, O=CCH), 3.62 and 3.74 (ABq, 2H, *J* = 13.5 Hz, PhCH<sub>2</sub>N), 7.22–8.05 (m, 10H, Ar-H); <sup>13</sup>C NMR  $\delta$  19.9, 20.8, 26.8, 47.8, 56.4, 64.5, 127.2, 128.1, 128.27, 128.29, 128.5, 133.0, 137.3, 137.8, 195.1

**(2*R*\*,3*S*\*)-2-Benzoyl-1-benzyl-3-(isopropyl)aziridine (3a).** 10% yield (7.3 mg); IR (film) 2959, 1668, 1448, 1227 cm<sup>–1</sup>; <sup>1</sup>H NMR  $\delta$  0.84 (d, 3H, *J* = 6.6 Hz, (CH<sub>3</sub>)<sub>2</sub>C), 0.91 (d, 3H, *J* = 6.9 Hz, (CH<sub>3</sub>)<sub>2</sub>C), 1.37–1.50 (m, 1H, (CH<sub>3</sub>)<sub>2</sub>CH), 2.38 (dd, 1H, *J* = 2.8 Hz, 8.0 Hz, (CH<sub>3</sub>)<sub>2</sub>CCH), 3.44 (d, 1H, *J* = 2.8 Hz, O=CCH), 3.80 (s, 2H, PhCH<sub>2</sub>N), 7.18–7.99 (m, 10H,



Ar-H);  $^{13}\text{C}$  NMR  $\delta$  19.5, 20.2, 31.8, 43.4, 54.8, 55.5, 127.0, 128.2, 128.3, 128.6, 128.9, 133.1, 138.3, 139.1, 196.0.

**(2*S*<sup>\*</sup>,3*S*<sup>\*</sup>)-2-Benzoyl-1-benzyl-3-(phenyl)aziridine (2b).** 45% yield (28 mg); IR (KBr) 1684, 1450, 1224  $\text{cm}^{-1}$ ;  $^1\text{H}$  NMR  $\delta$  3.32 (d, 1H,  $J = 6.9$  Hz,  $\text{O}=\text{CCH}$ ), 3.41 (d, 1H,  $J = 6.9$  Hz,  $\text{PhCH}$ ), 3.82 and 4.04 (ABq, 2H,  $J = 14.0$  Hz,  $\text{PhCH}_2\text{N}$ ), 7.10–7.88 (m, 15H, Ar-H);  $^{13}\text{C}$  NMR  $\delta$  49.7, 51.1, 63.8, 127.1, 127.4, 127.5, 127.8, 127.9, 128.1, 128.3, 128.4, 132.9, 134.9, 136.9, 137.7, 193.1.

**(2*R*<sup>\*</sup>,3*S*<sup>\*</sup>)-2-Benzoyl-1-benzyl-3-(phenyl)aziridine (3b).** 16% yield (10 mg); IR (film) 1668, 1448, 1230  $\text{cm}^{-1}$ ;  $^1\text{H}$  NMR  $\delta$  3.63–3.67 (m, 2H,  $\text{PhCH}$ ,  $\text{O}=\text{CCH}$ ), 4.01 and 4.17 (ABq, 2H,  $J = 13.7$  Hz,  $\text{PhCH}_2\text{N}$ ), 7.12–8.04 (m, 15H, Ar-H).

**(2*S*<sup>\*</sup>,3*S*<sup>\*</sup>)-2-Benzoyl-1-benzyl-3-(4-methoxy)phenylaziridine (2c).** 52% yield (13.2 mg); IR (film) 1687, 1613, 1229, 1032  $\text{cm}^{-1}$ ;  $^1\text{H}$  NMR  $\delta$  3.28 (d, 1H,  $J = 6.9$  Hz,  $\text{O}=\text{CCH}$ ), 3.37 (d, 1H,  $J = 6.9$  Hz,  $\text{MeO-PhCH}$ ), 3.70 (s, 3H,  $\text{MeO}$ ), 3.79 and 4.03 (ABq, 2H,  $J = 14.0$  Hz,  $\text{PhCH}_2\text{N}$ ), 6.70–7.89 (m, 14H, Ar-H);  $^{13}\text{C}$  NMR  $\delta$  49.6, 51.1, 55.1, 63.8, 113.4, 126.9, 127.1, 127.8, 128.1 (2C), 128.4, 128.6, 132.9, 137.0, 137.8, 158.8, 193.3.

**(2*R*<sup>\*</sup>,3*S*<sup>\*</sup>)-2-Benzoyl-1-benzyl-3-(4-methoxy)phenylaziridine (3c).** 23% yield (6 mg);  $^1\text{H}$  NMR  $\delta$  3.59 (d, 1H,  $J = 2.8$  Hz,  $\text{O}=\text{CCH}$ ), 3.62 (d, 1H,  $J = 2.8$  Hz,  $4\text{MeO-PhCH}$ ), 3.79 (s, 3H,  $\text{MeO}$ ), 4.01 and 4.17 (ABq, 2H,  $J = 14.0$  Hz,  $\text{PhCH}_2\text{N}$ ), 6.82–8.02 (m, 14H, Ar-H).

**(2*S*<sup>\*</sup>,3*S*<sup>\*</sup>)-2-Benzoyl-1-benzyl-3-(heptyl)aziridine (2d).** 61% yield (44 mg); **3d** in 25% yield (17.2 mg);  $^1\text{H}$  NMR  $\delta$  0.88 (t, 3H,  $J = 6.6$  Hz,  $\text{MeCH}$ ), 1.0–1.6 (m, 12H,  $\text{CH}_3(\text{CH}_2)_6\text{CH}$ ), 2.26 (m, 1H,  $\text{CH}_2\text{CH}$ ), 3.14 (d, 1H,  $J = 7.2$  Hz,  $\text{O}=\text{CCH}$ ), 3.68 and 3.84 (ABq, 2H,  $J = 14.0$  Hz,  $\text{PhCH}_2\text{N}$ ), 7.25–8.10 (m, 10H, Ar-H);  $^{13}\text{C}$  NMR  $\delta$  14.0, 22.5, 27.4, 27.6, 29.0, 29.1, 31.5, 47.4, 49.1, 64.2, 127.1, 128.0, 128.1, 128.3, 128.5, 133.0, 137.2, 138.0, 195.1.

**(2*S*<sup>\*</sup>)-2-Benzoyl-1-benzyl-3,3-(dimethyl)aziridine (2e).** 66% yield (15 mg);  $^1\text{H}$  NMR  $\delta$  1.21 (s, 3H,  $\text{MeMeC}$ ), 1.54 (s, 3H,  $\text{MeMeC}$ ), 2.93 (s, 1H,  $\text{Me}_2\text{CH}$ ), 3.86 and 3.94 (ABq, 2H,  $J = 14.6$  Hz,  $\text{PhCH}_2\text{N}$ ), 7.19–7.98 (m, 10H, Ar-H);  $^{13}\text{C}$  NMR  $\delta$  17.8, 21.7, 46.6, 54.5, 56.2, 126.7, 127.2, 128.0, 128.5, 133.0, 137.3, 139.1, 195.7.

**(2*S*<sup>\*</sup>,3*S*<sup>\*</sup>)-2-Acetyl-1-benzyl-3-(phenyl)aziridine (2f).** 47% yield (26 mg);  $^1\text{H}$  NMR

(300 MHz, CDCl<sub>3</sub>)  $\delta$  1.72 (s, 3H, O=CMe), 2.63 (d, 1H,  $J$  = 7.1 Hz, O=CCH), 3.18 (d, 1H,  $J$  = 7.1 Hz, PhCH), 3.71 and 3.80 (ABq, 2H,  $J$  = 13.5 Hz, PhCH<sub>2</sub>N), 7.18–7.46 (m, 10H, Ar-H); <sup>13</sup>C NMR  $\delta$  28.5, 48.7, 52.8, 63.9, 127.4, 127.5, 127.7, 128.1, 128.2, 128.5, 135.2, 137.9, 205.9.

**(2R\*, 3S\*)-1-Benzyl-3-phenyl-2-(trimethylsilyl)-2-[(trimethylsilyl)carbonyl]-aziridine (2g).** 56% yield (28 mg); IR (film) 2953, 1626, 1250 cm<sup>-1</sup>; <sup>1</sup>H NMR  $\delta$  0.03 (s, 9H, SiMe<sub>3</sub>), 0.32 (s, 9H, SiMe<sub>3</sub>), 3.27 (s, 1H, PhCH), 3.49 and 4.54 (ABq, 2H,  $J$  = 12.4 Hz, PhCH<sub>2</sub>N), 6.92–7.48 (m, 10H, Ar-H); <sup>13</sup>C NMR  $\delta$  -2.0, 1.2, 54.1, 58.0, 60.7, 126.6, 127.3, 127.7, 127.8, 128.0, 128.5, 137.2, 139.4, 249.2.

**(2R\*, 3S\*)-1-Benzyl-3-isopropyl-2-(trimethylsilyl)-2-[(trimethylsilyl)carbonyl]aziridine (2h).** 92% yield (67 mg); IR (film) 2955, 1627, 1250, 1069 cm<sup>-1</sup>; <sup>1</sup>H NMR  $\delta$  0.23 (s, 18H, SiMe<sub>3</sub> x 2), 0.46 (d, 3H,  $J$  = 6.1 Hz, (CH<sub>3</sub>)<sub>2</sub>C), 0.7–0.9 (m, 4H, (CH<sub>3</sub>)<sub>2</sub>C, (CH<sub>3</sub>)<sub>2</sub>CH), 1.68 (d, 1H,  $J$  = 8.8 Hz, BnNCH), 3.15 and 4.40 (ABq, 2H,  $J$  = 12.4 Hz, PhCH<sub>2</sub>N), 7.27–7.42 (m, 5H, Ar-H); <sup>13</sup>C NMR  $\delta$  -1.6, 1.1, 18.3, 21.2, 30.8, 56.1, 60.6, 60.8, 127.1, 128.2, 128.8, 139.8, 250.4.

**(2S\*, 3S\*)-1-Benzyl-3-isopropyl-2-(pentanoyl)aziridine (2i).** 63% yield (34 mg); **3i** in 4% yield (2 mg); <sup>1</sup>H NMR  $\delta$  0.79 (d, 3H,  $J$  = 6.9 Hz, (CH<sub>3</sub>)<sub>2</sub>C), 0.87 (t, 3H, 7.14 Hz, CH<sub>2</sub>CH<sub>3</sub>), 0.90 (d, 3H,  $J$  = 6.6 Hz, (CH<sub>3</sub>)<sub>2</sub>C), 1.21–1.34 (m, 2H, CH<sub>2</sub>CH<sub>3</sub>), 1.37–1.57 (m, 3H, (CH<sub>3</sub>)<sub>2</sub>CH, CH<sub>2</sub>CH<sub>2</sub>CH<sub>3</sub>), 1.68 (dd, 1H,  $J$  = 7.0 Hz, 9.3 Hz, (CH<sub>3</sub>)<sub>2</sub>CCH), 2.35 (d, 1H,  $J$  = 7.0 Hz, O=CCH), 2.39–2.58 (m, 2H, O=CCH<sub>2</sub>) 3.43 and 3.60 (ABq, 2H,  $J$  = 13.2 Hz, PhCH<sub>2</sub>N), 7.2–7.4 (m, 5H, Ar-H); <sup>13</sup>C NMR  $\delta$  13.8, 19.8, 20.9, 22.3, 25.7, 27.2, 41.9, 49.6, 55.7, 64.6, 127.2, 128.3, 128.4, 138.0, 208.9.

**(2S\*, 3S\*)-1-Benzyl-2-formyl-3-(isopropyl)aziridine (2j).** 39% yield (28 mg); <sup>1</sup>H NMR  $\delta$  0.95 (d, 3H,  $J$  = 6.3 Hz, (CH<sub>3</sub>)<sub>2</sub>C), 0.95 (d, 3H,  $J$  = 6.9 Hz, (CH<sub>3</sub>)<sub>2</sub>C), 1.58–1.72 (m, 1H, (CH<sub>3</sub>)<sub>2</sub>CH), 1.84 (dd, 1H,  $J$  = 6.9 Hz, 9.9 Hz, (CH<sub>3</sub>)<sub>2</sub>CCH), 2.24–2.28 (m 1H, O=CCH), 3.50 and 3.74 (ABq, 2H,  $J$  = 12.9 Hz, PhCH<sub>2</sub>N), 7.32–7.45 (m, 5H, Ar-H), 9.39 (d, 1H,  $J$  = 5.8 Hz, O=CH); <sup>13</sup>C NMR  $\delta$  19.6, 21.2, 28.9, 49.9, 55.5, 64.1, 127.5, 128.5, 128.5, 137.8, 201.3.

**(2S, 3S)-2-Pentanoyl-3-phenyl-1-[(1S)-1-phenylethyl]aziridine (2k).** 64% yield (18 mg);  $[\alpha]_D^{28}$  -42.1 (c 0.78, CHCl<sub>3</sub>); <sup>1</sup>H NMR  $\delta$  0.73 (t, 3H,  $J$  = 7.1 Hz, CH<sub>2</sub>CH<sub>3</sub>),

0.98–1.13 (m, 2H,  $\text{CH}_2\text{CH}_3$ ), 1.15–1.45 (m, 2H,  $\text{CH}_2\text{CH}_2\text{CH}_3$ ), 1.52 (d, 3H,  $J = 6.3$  Hz,  $\text{PhMeCH}$ ), 1.85–1.95 (m, 1H,  $\text{CHH}(\text{CH}_2)_2\text{CH}_3$ ), 2.26–2.36 (m, 1H,  $\text{CHH}(\text{CH}_2)_2\text{CH}_3$ ), 2.62 (d, 1H,  $J = 7.4$  Hz,  $\text{OC=CH}$ ), 2.79–2.85 (m, 2H,  $\text{PhCHMe}$ ), 3.07 (d, 1H,  $J = 7.4$  Hz,  $\text{NCH}$ ), 7.10–7.55 (m, 10H, Ar-H);  $^{13}\text{C}$  NMR  $\delta$  13.7, 22.0, 22.8, 25.1, 40.4, 48.3, 52.5, 69.9, 127.0, 127.2, 127.4, 127.7, 128.0, 128.5, 135.4, 143.5, 208.1.; exact mass,  $m/z$  307.1931 (calcd for  $\text{C}_{21}\text{H}_{25}\text{NO}$   $m/z$  307.1936).

**(2R\*,3S\*)-2-Benzoyl-1-benzyl-3-(3-benzyloxy)propyl-2-[(tert-butyldimethylsilyloxy)methyl]aziridine (2l).** 90% yield (49 mg);  $^1\text{H}$  NMR  $\delta$  -0.09 (s, 3H,  $\text{tert-BuSiCH}_3\text{CH}_3$ ) 0.02 (s, 3H,  $\text{tert-BuSiCH}_3\text{CH}_3$ ), 0.81 (s, 9H,  $(\text{CH}_3)_3\text{CSi}$ ), 0.99–1.58 (m, 4H,  $\text{BnOCH}_2\text{CH}_2\text{CH}_2$ ), 1.88–1.92 (m, 1H,  $\text{NCH}$ ), 3.22–3.33 (m, 2H,  $\text{BnOCH}_2$ ), 3.51 and 4.42 (ABq, 2H,  $J = 12.4$  Hz,  $\text{PhCH}_2\text{N}$ ), 3.91 and 4.56 (ABq, 2H,  $J = 11.5$  Hz,  $\text{CH}_2\text{OTBS}$ ), 4.35 (s, 2H,  $\text{PhCH}_2\text{O}$ ), 7.22–8.15 (m, 15H, Ar-H);  $^{13}\text{C}$  NMR  $\delta$  -5.8, -5.8, 18.0, 25.7, 27.2, 27.6, 47.9, 55.7, 56.0, 61.7, 69.6, 72.5, 127.0, 127.4, 127.6, 127.8, 128.2, 128.6, 129.0, 129.8, 123.5, 137.2, 138.5, 139.3, 200.3.; exact mass,  $m/z$  529.3017 (calcd for  $\text{C}_{33}\text{H}_{43}\text{NO}_3\text{Si}$   $m/z$  529.3012).

**(2S, 3S)-2-Benzoyl-1-benzyl-2-(tert-butyldimethylsilyloxy)methyl-3-[(1S)-1-(methoxymethoxy)ethyl]aziridine (2m).** 37% yield (7.2 mg);  $[\alpha]_{\text{D}}^{30} +22.0$  (c 0.35,  $\text{CHCl}_3$ );  $^1\text{H}$  NMR  $\delta$  -0.08 (s, 3H,  $\text{tert-BuSiCH}_3\text{CH}_3$ ) 0.04 (s, 3H,  $\text{tert-BuSiCH}_3\text{CH}_3$ ), 0.80 (s, 9H,  $(\text{CH}_3)_3\text{CSi}$ ), 1.16 (d, 3H,  $J = 6.3$  Hz,  $\text{MeCH}$ ), 1.96 (d, 1H,  $J = 9.8$  Hz,  $\text{NCH}$ ), 3.02 (s, 3H,  $\text{MeO}$ ), 3.00–3.07 (m, 1H,  $\text{MeCH}$ ), 3.50 and 4.43 (ABq, 2H,  $J = 12.9$  Hz,  $\text{PhCH}_2\text{N}$ ), 3.92 and 4.43 (ABq, 2H,  $J = 11.5$  Hz,  $\text{CH}_2\text{OTBS}$ ), 3.95 and 4.61 (ABq, 2H,  $J = 6.9$  Hz,  $\text{MeOCH}_2\text{O}$ ), 7.22–7.99 (m, 10H, Ar-H);  $^{13}\text{C}$  NMR  $\delta$  -5.8, -5.7, 18.1, 18.2, 25.7, 52.9, 54.3, 54.9, 56.3, 62.0, 73.2, 95.0, 127.2, 127.7, 128.2, 129.2, 129.9, 132.5, 137.2, 138.8, 199.9.; exact mass,  $m/z$  469.2642 (calcd for  $\text{C}_{27}\text{H}_{39}\text{NO}_4\text{Si}$   $m/z$  469.2648).

**5-Acetyl-1-benzyl-2-phenyl-3-(ethoxycarbonyl)pyrrole (5).** A solution of **2f** (27 mg, 0.11 mmol) and ethyl propiolate (0.2 mL) in benzene (3 mL) was heated at 80 °C for 12 h. The mixture was concentrated and purified by CC to give **5** (23 mg, 62 %) as a colorless oil. IR (film) 2983, 1705, 1645  $\text{cm}^{-1}$ ;  $^1\text{H}$  NMR  $\delta$  1.11 (t, 3H,  $J = 7.1$  Hz), 2.47 (s, 3H), 4.13 (q, 2H,  $J = 7.1$  Hz), 5.47 (s, 2H), 6.75–6.80 (m, 2H), 7.15–7.42 (m, 8H), 7.59 (s, 1H);  $^{13}\text{C}$  NMR  $\delta$  14.0, 27.5, 49.6, 59.9, 114.4, 121.8, 125.9, 127.0, 128.0, 128.3, 129.1, 129.9, 130.2, 138.1, 145.5, 163.7, 188.6.

9-98 C

Pulse Sequence: zgpg30

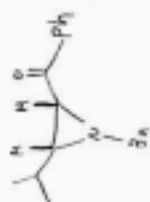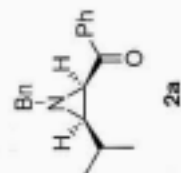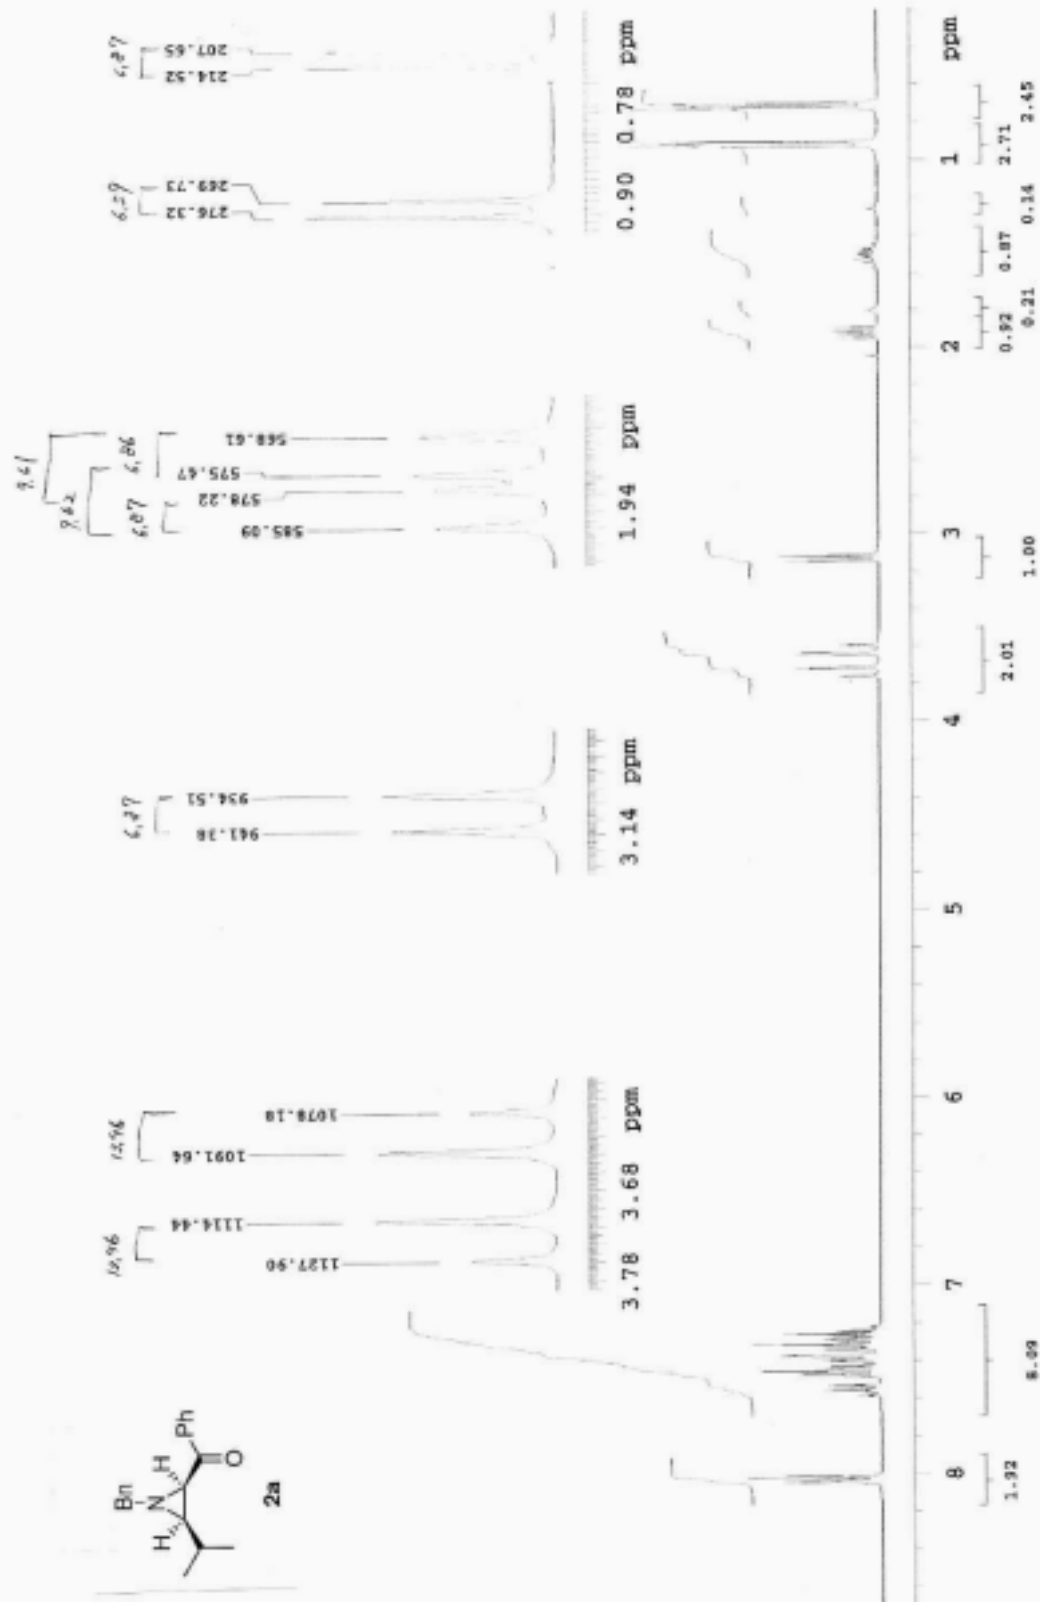

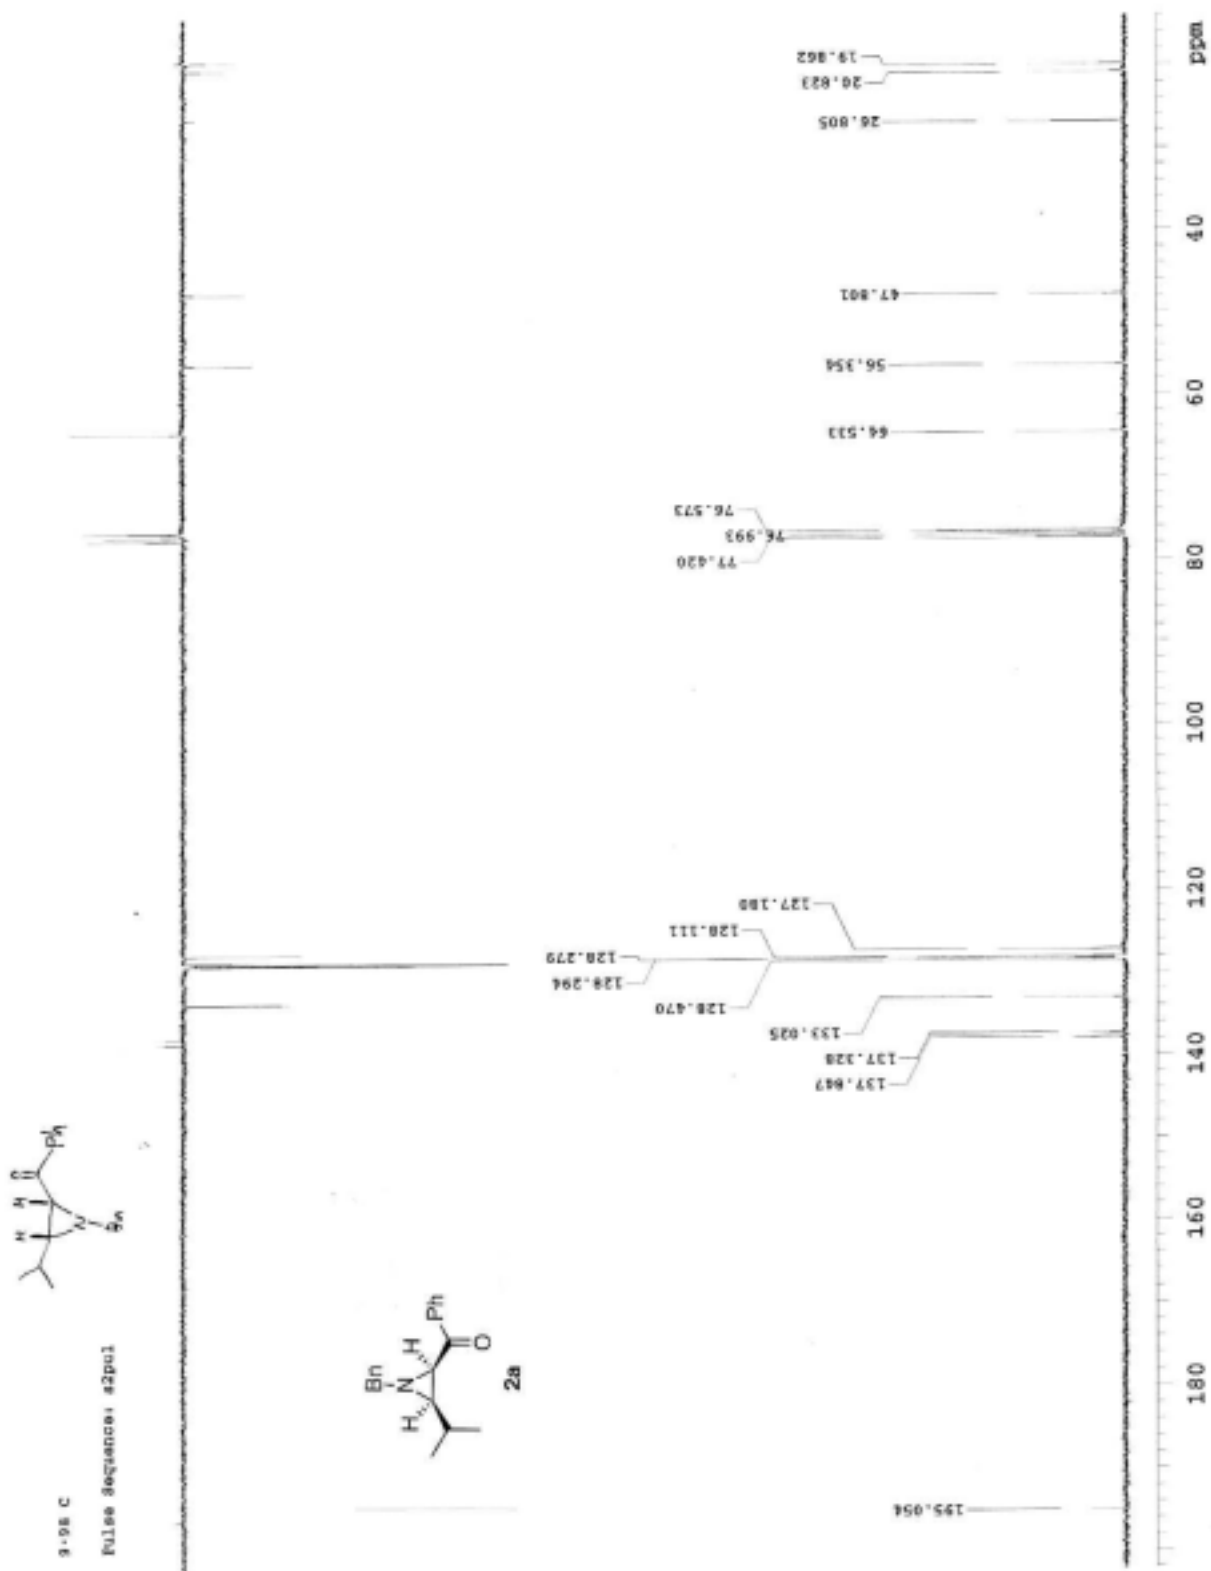

10-59 D

Pulse Sequence: zgpg1

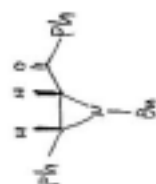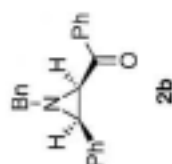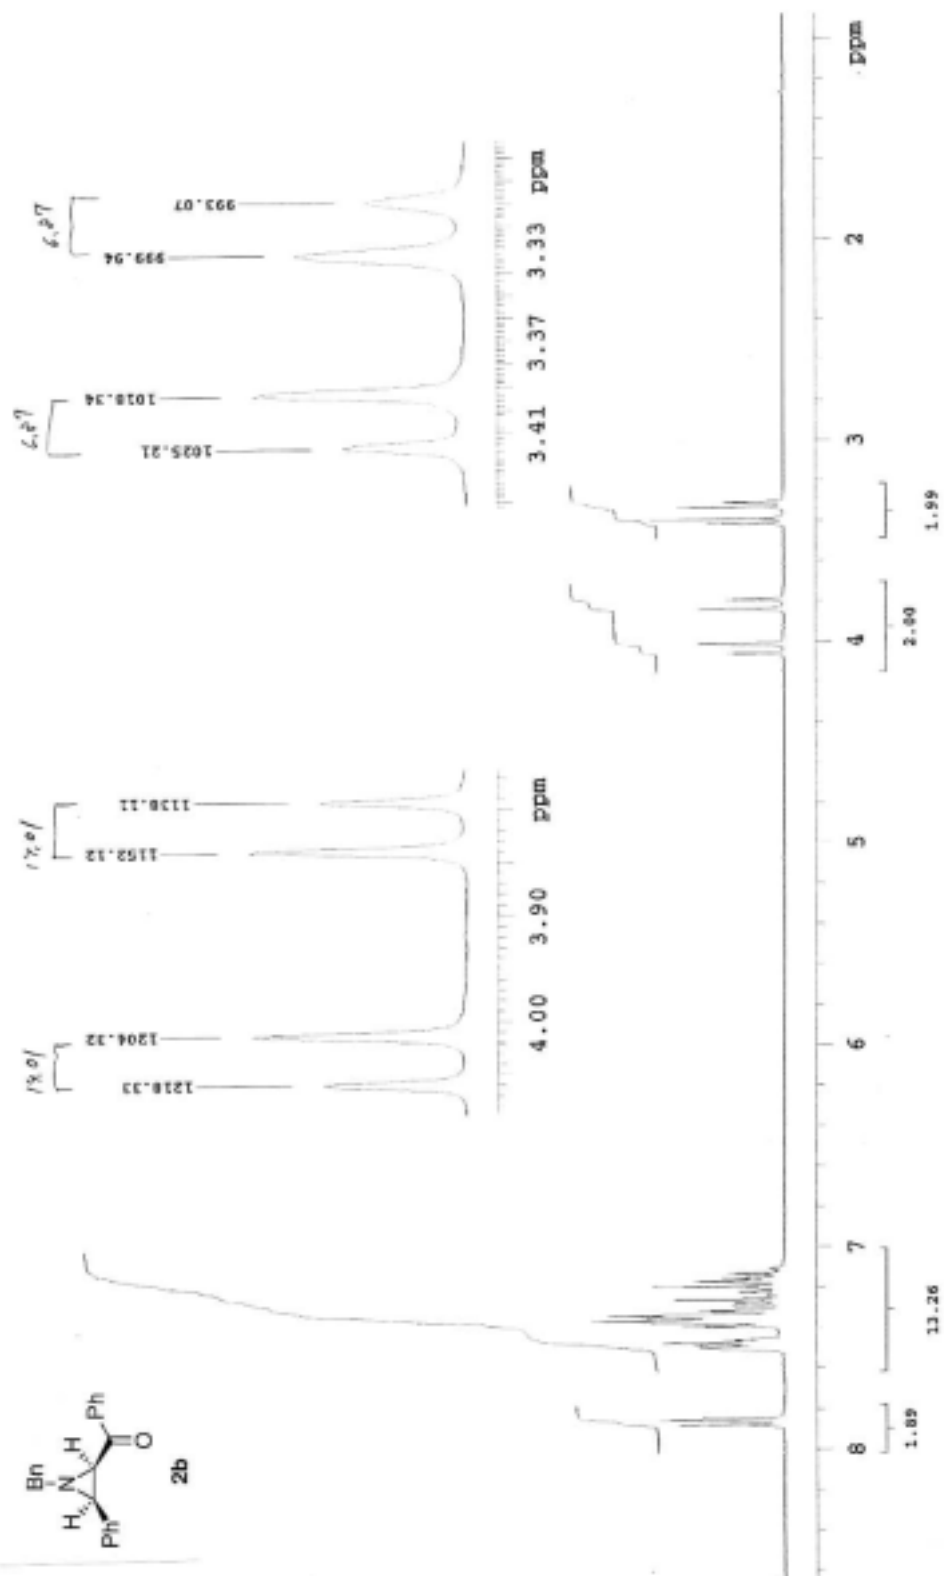

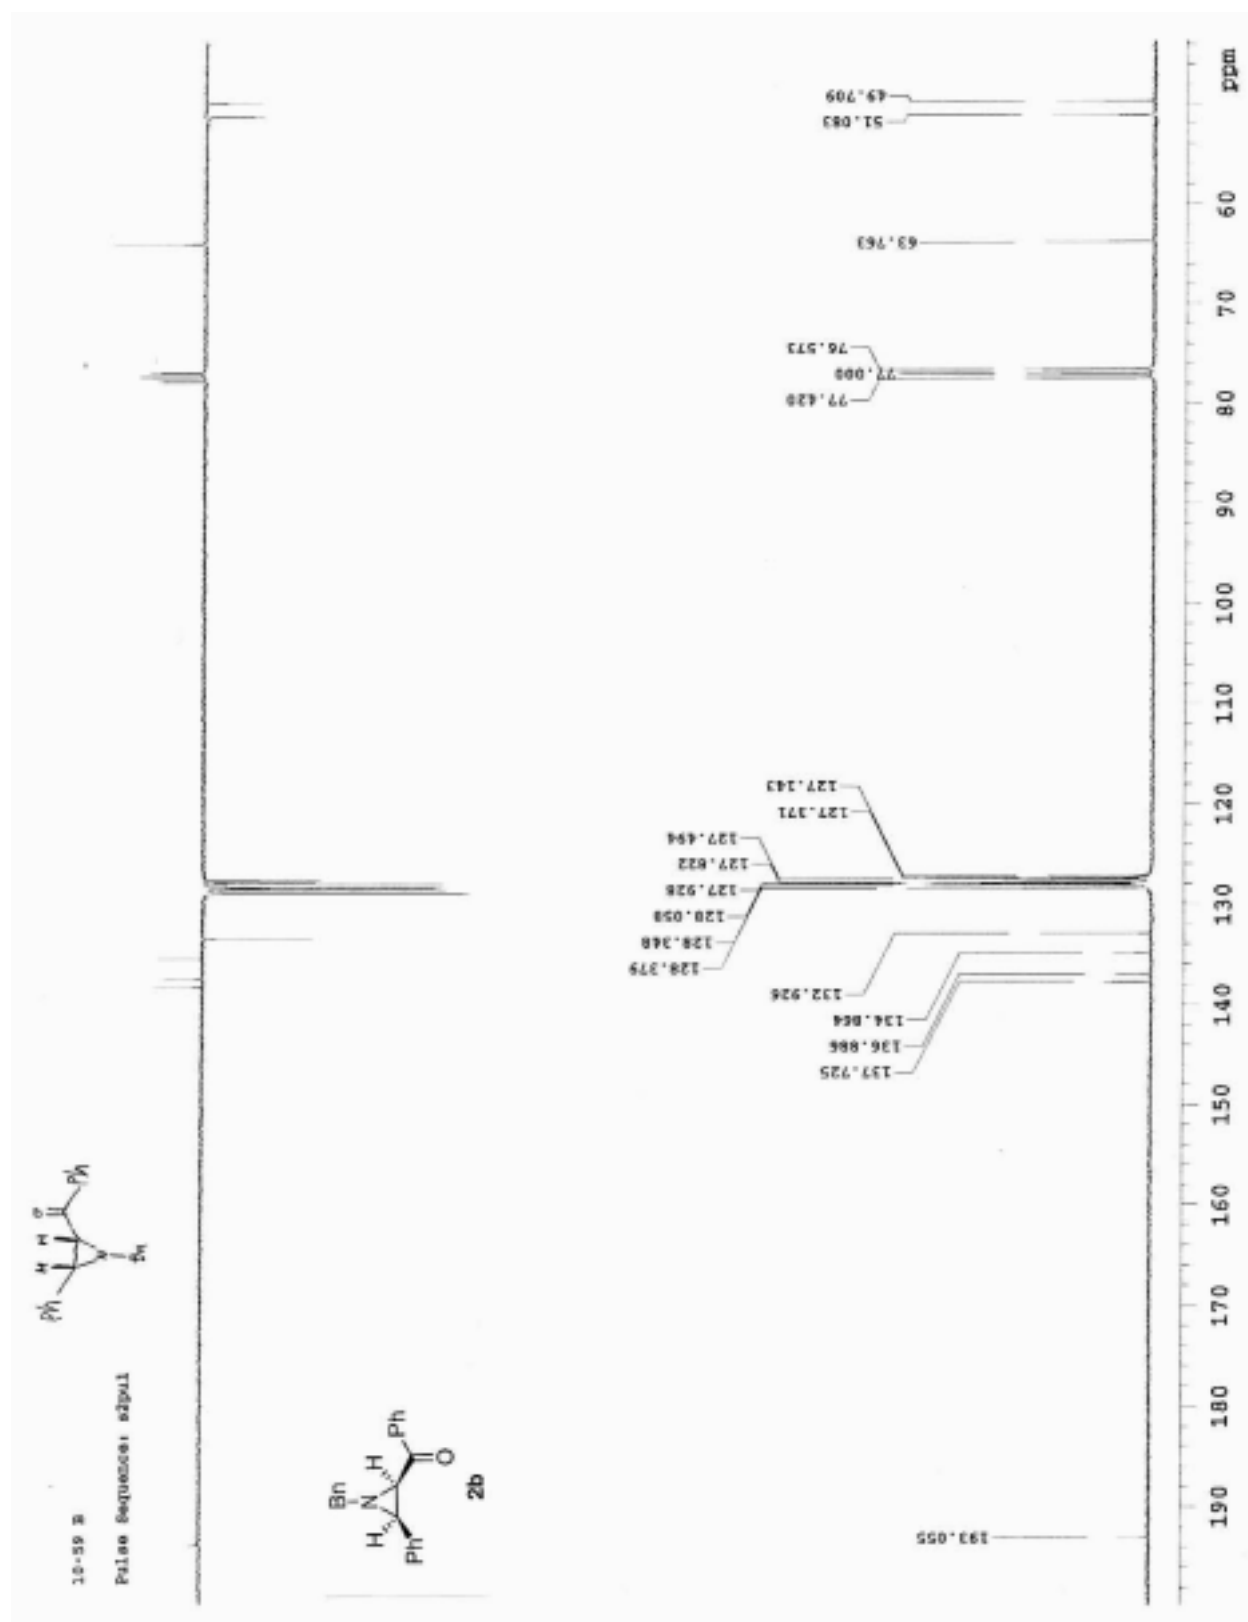



19-61 8

Pulse Sequence: zgpg30

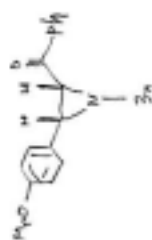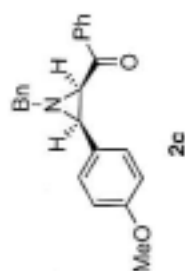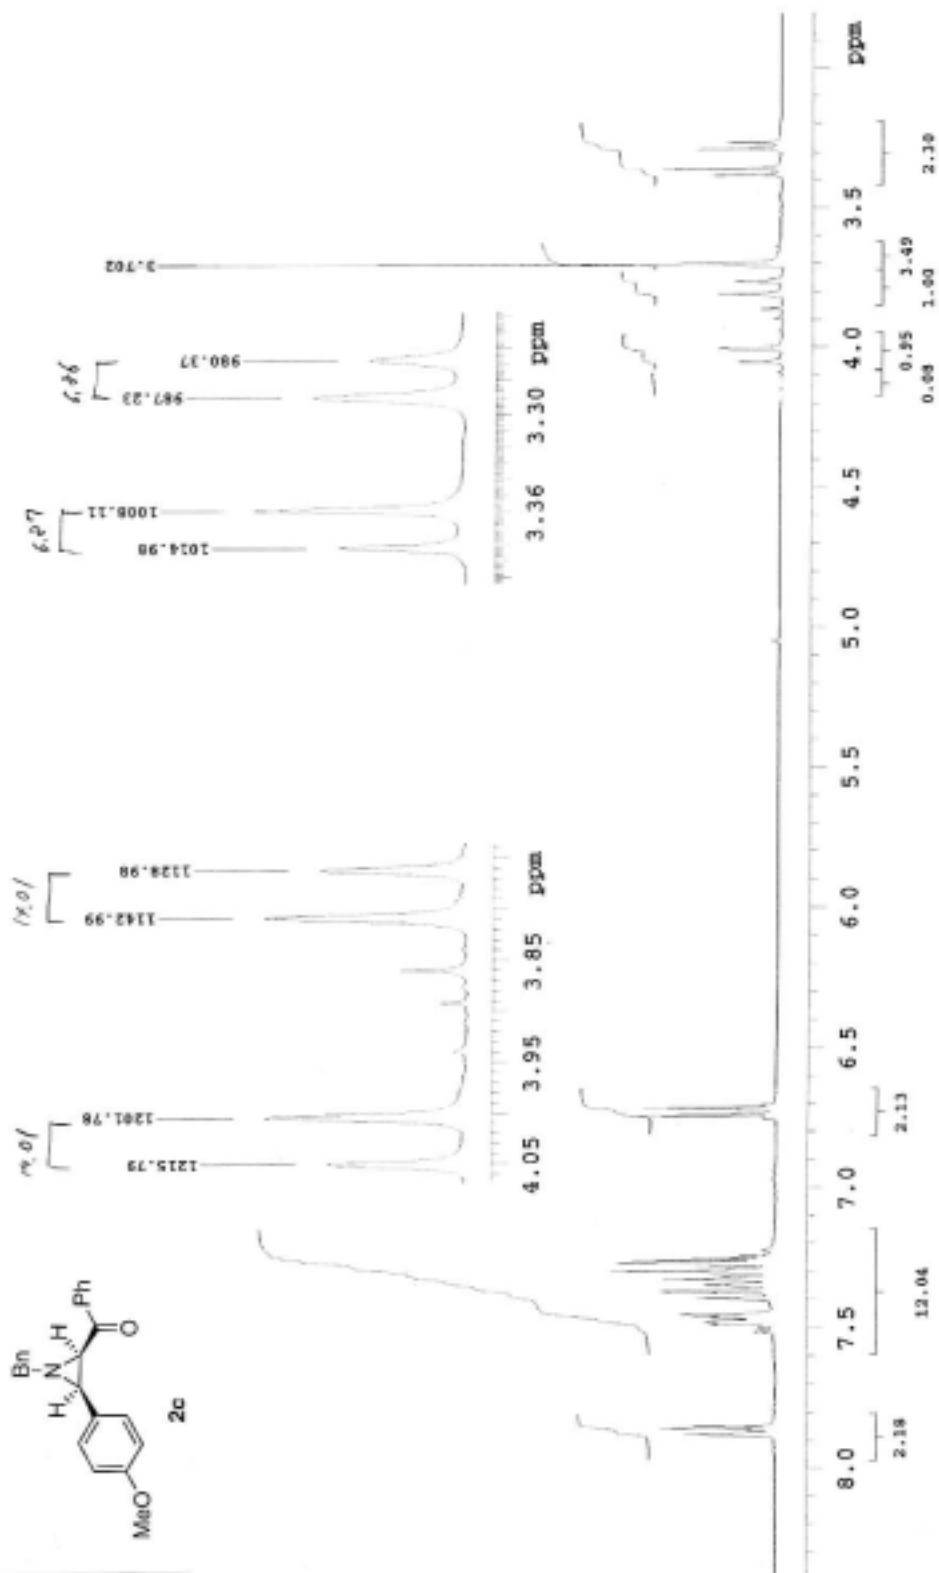

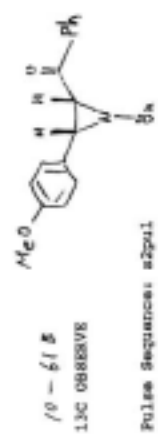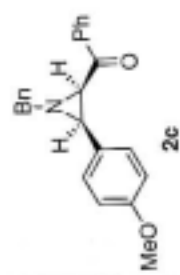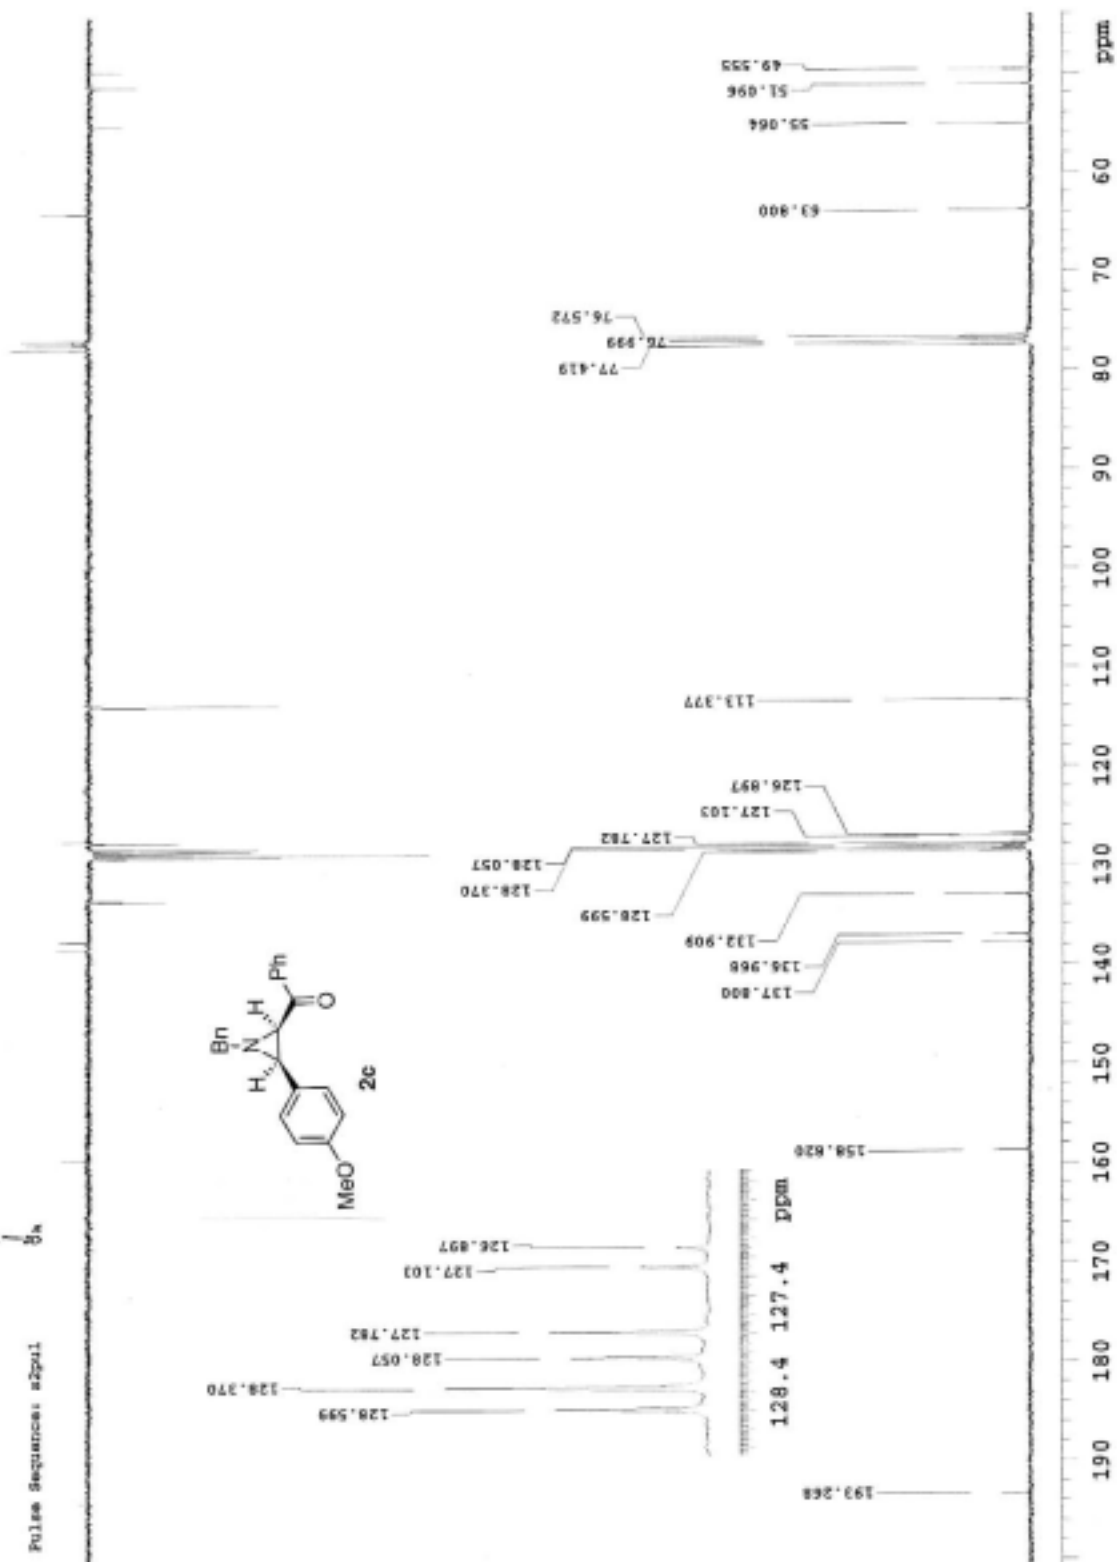

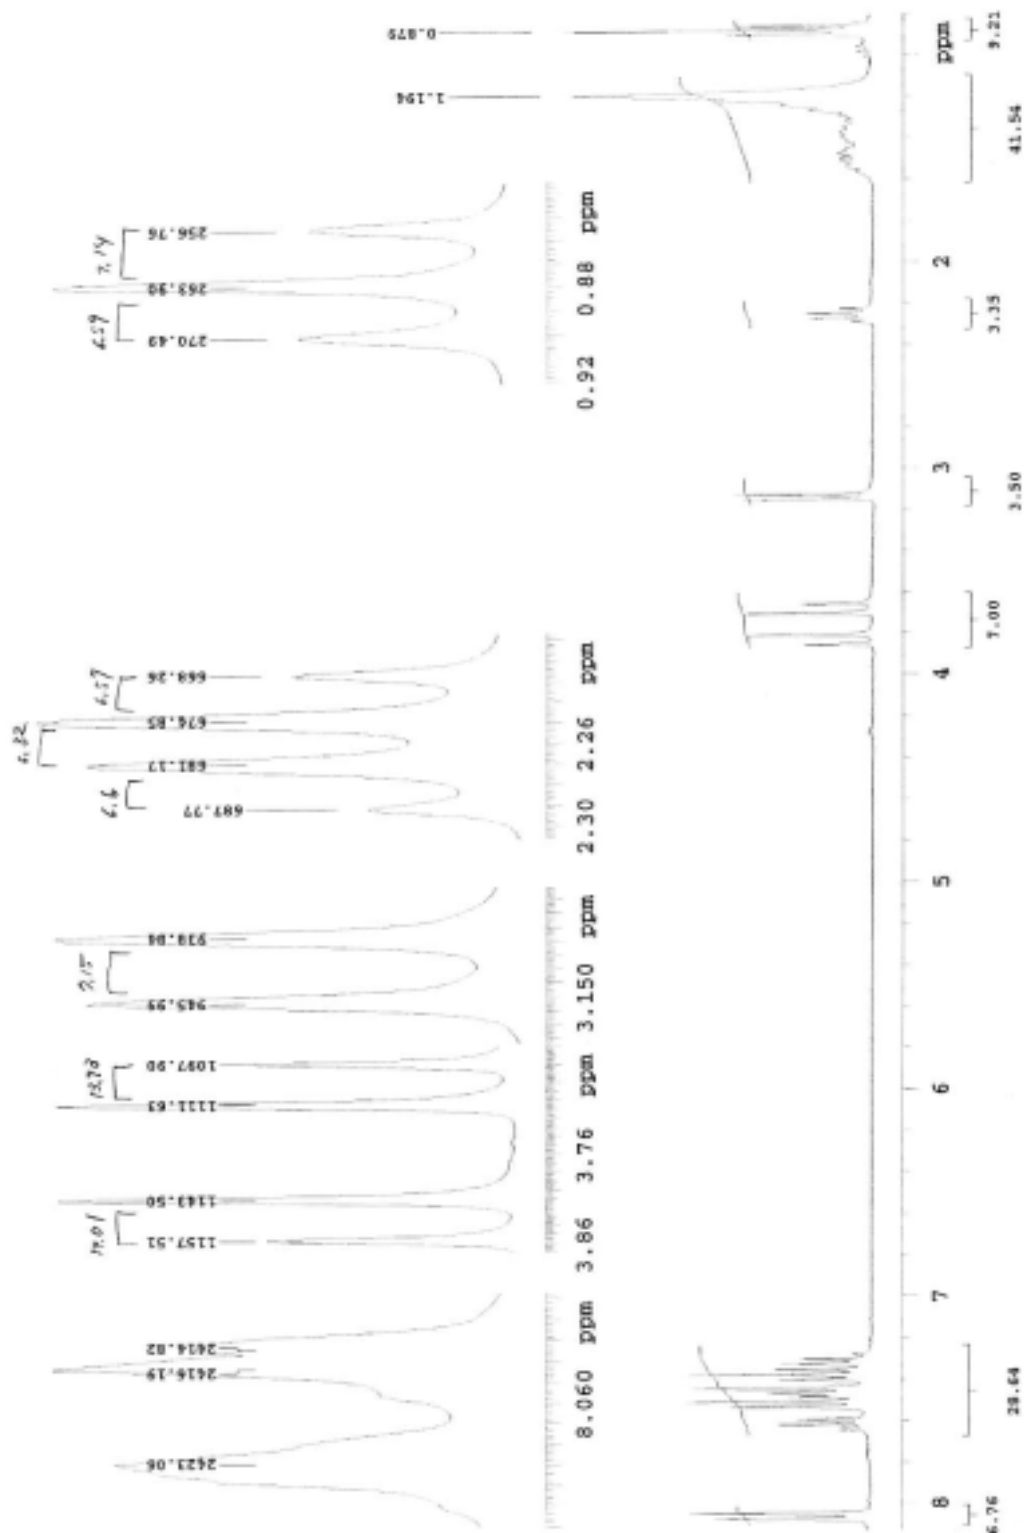

|                                                                                                                                  |                                                                         |                                                                                                                      |
|----------------------------------------------------------------------------------------------------------------------------------|-------------------------------------------------------------------------|----------------------------------------------------------------------------------------------------------------------|
| <b>PULSE SEQUENCE</b><br>Relax. delay 1.502 sec<br>Pulse 45.0 degree<br>Acq. time 3.498 sec<br>Width 4580.5 Hz<br>28 repetitions | <b>OBSERVE</b> H1, 300.0036342<br>F2 size 32768<br>Total time 2 minutes | <b>NAME</b><br>MK-13-17-C<br>Pulse Sequence: zgpg30<br>Solvent: CDCl3<br>Ambient temperature<br>Mercury-300 *varian* |
|----------------------------------------------------------------------------------------------------------------------------------|-------------------------------------------------------------------------|----------------------------------------------------------------------------------------------------------------------|

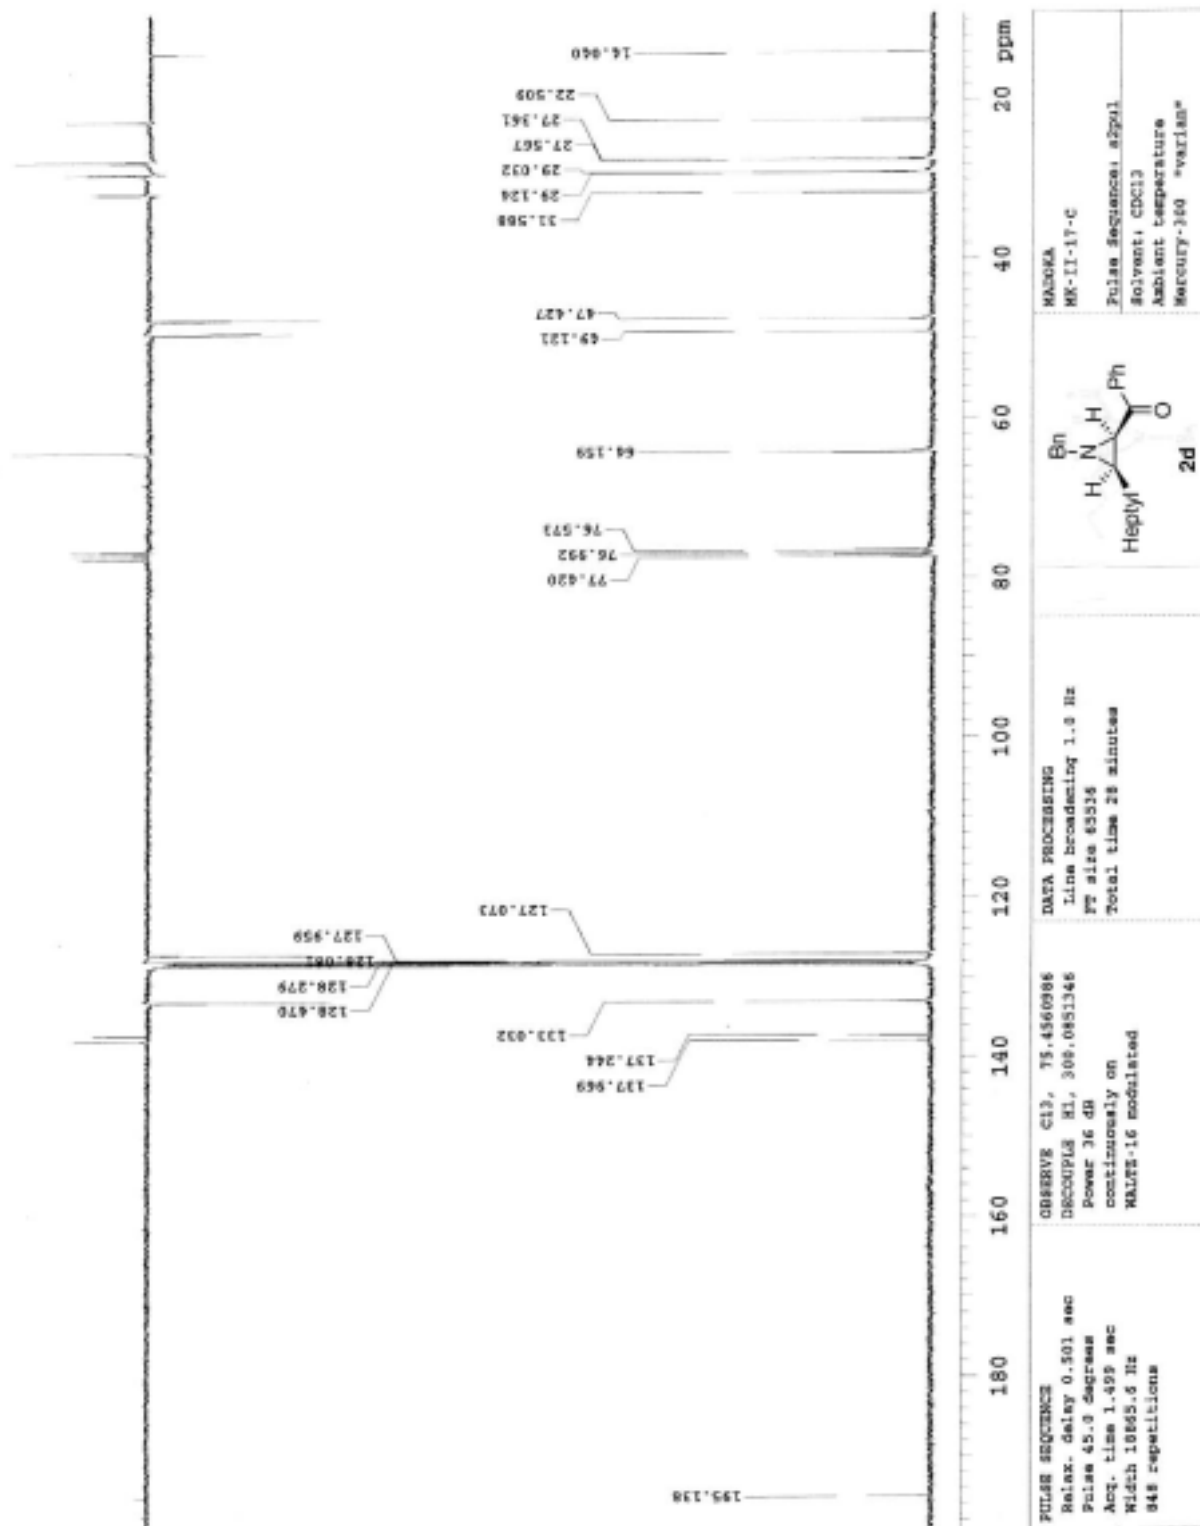

10-74 B

Pulse Sequence: zgpg1

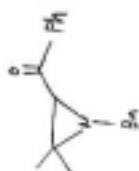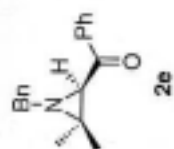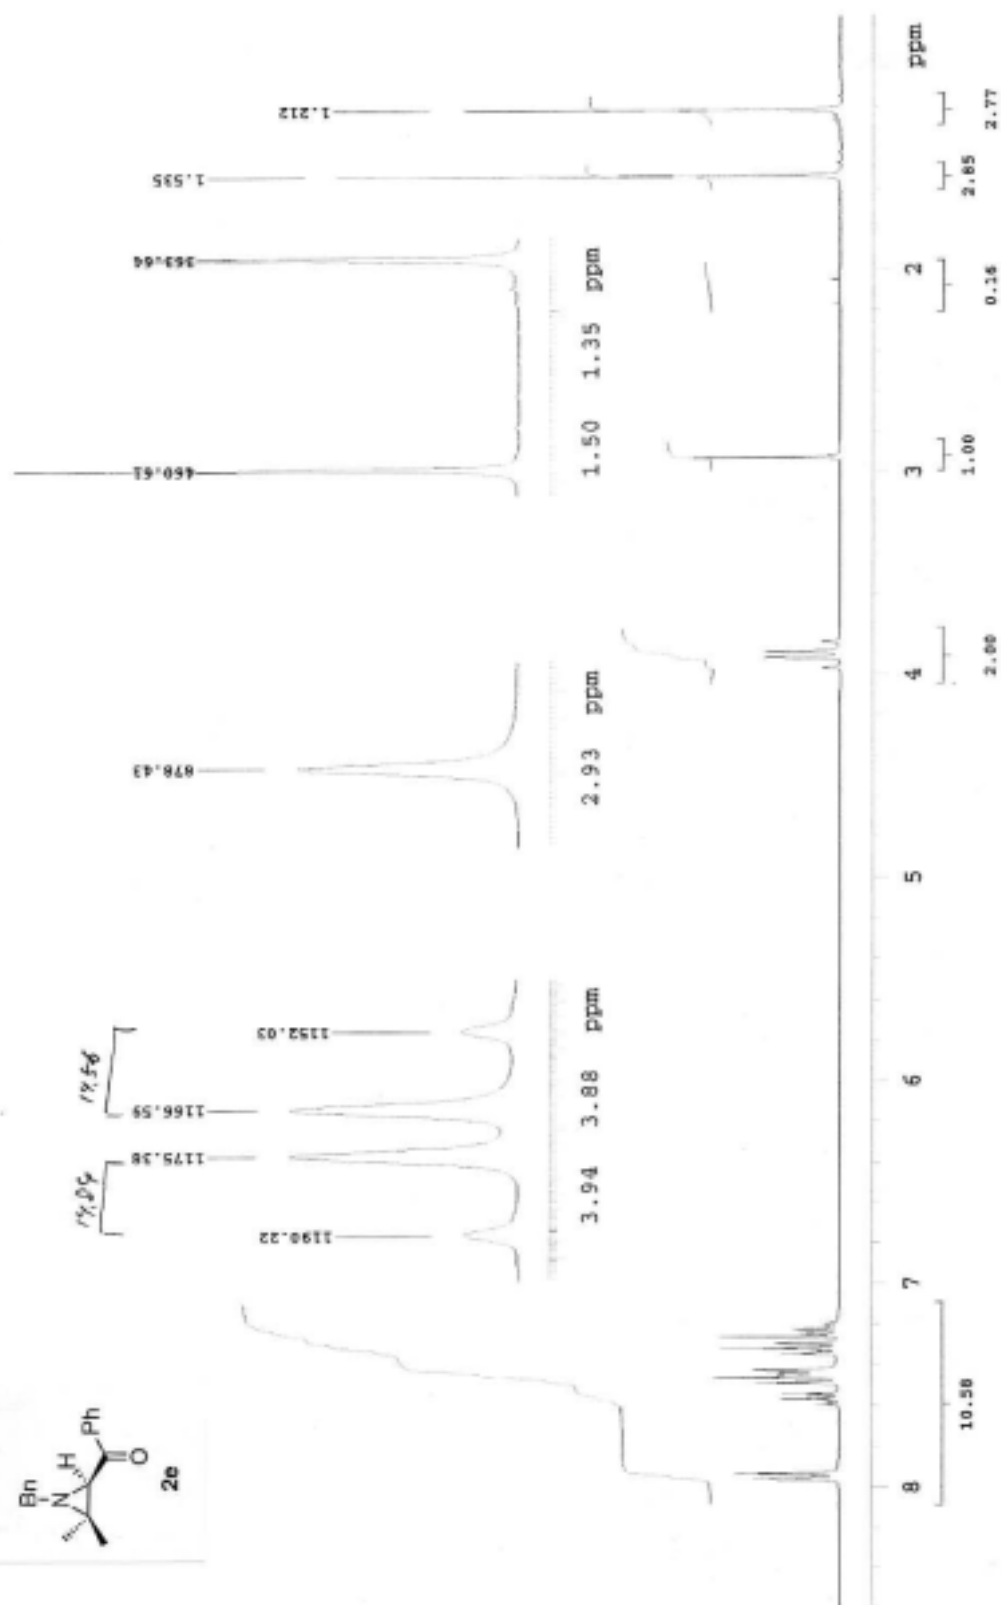

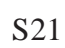

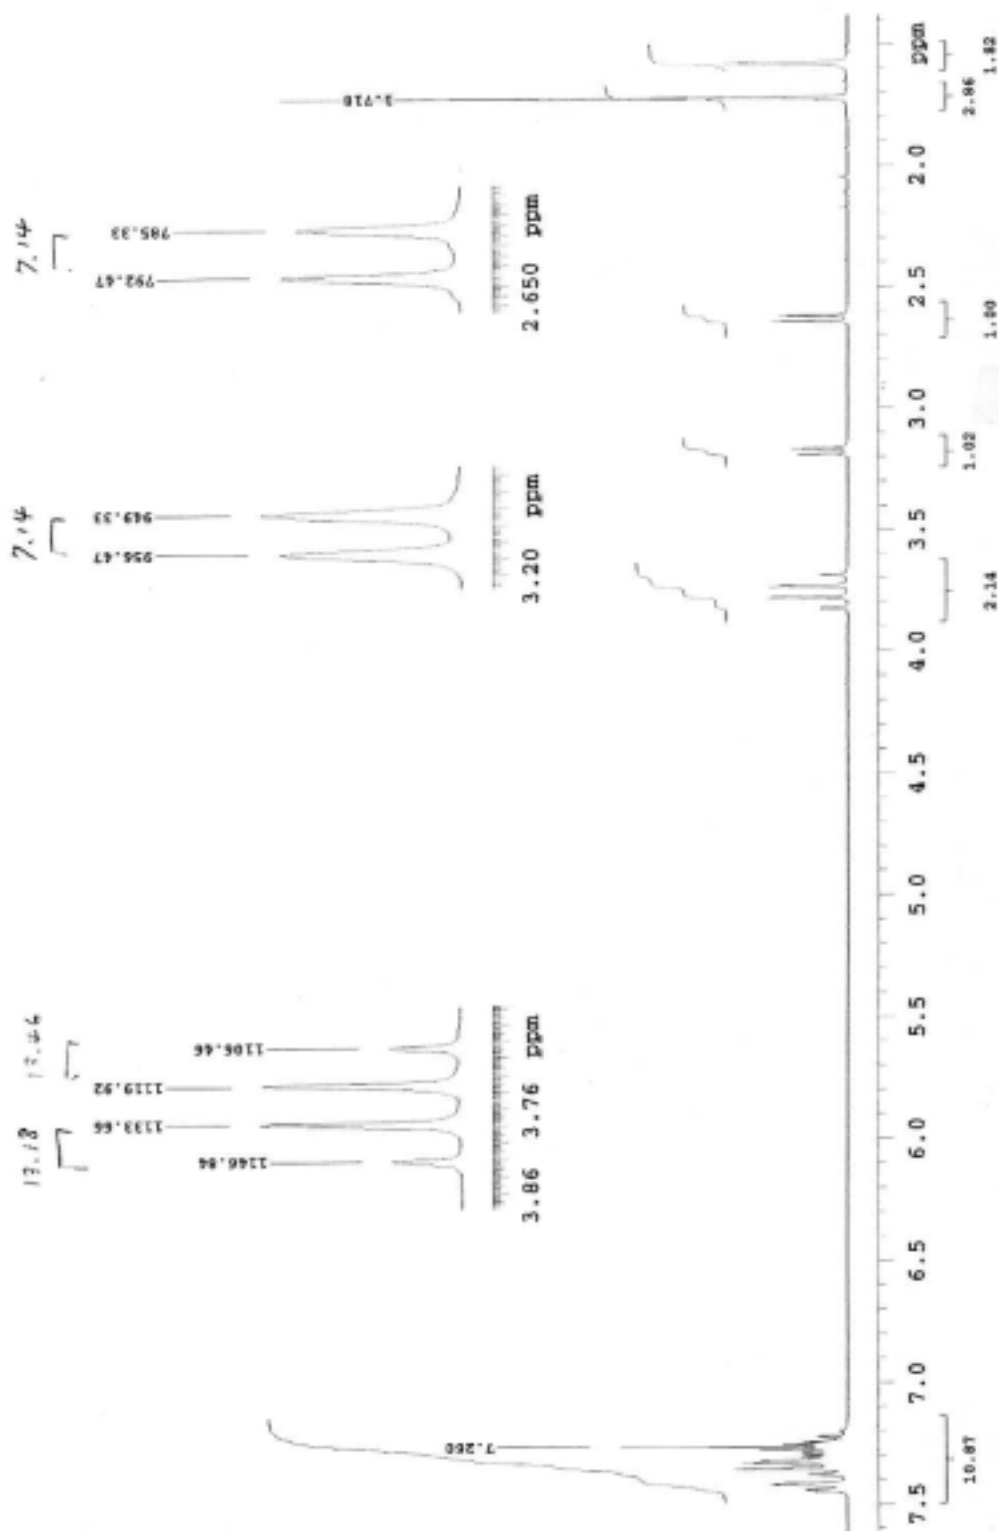

|                                                                                                                                   |                                                                                                                |                                                       |                                                                                                                            |
|-----------------------------------------------------------------------------------------------------------------------------------|----------------------------------------------------------------------------------------------------------------|-------------------------------------------------------|----------------------------------------------------------------------------------------------------------------------------|
| <b>PULSE SEQUENCE</b><br>Relax. delay 1.502 sec<br>Pulse 45.0 degrees<br>Acq. time 3.498 sec<br>Width 4506.5 Hz<br>20 repetitions | <b>CGSHEET</b> H <sub>1</sub> , 340.6834525<br><b>DATA PROCESSING</b><br>F2 size 32768<br>Total time 1 minutes | <b>2f</b><br><chem>O=C[C@H](c1ccccc1)Nc2ccccc2</chem> | <b>JEOL JNM-71D</b><br>Pulse Sequence: zgpg30<br>Solvent: CDCl <sub>3</sub><br>Ambient temperature<br>Mercury-300 "varian" |
|-----------------------------------------------------------------------------------------------------------------------------------|----------------------------------------------------------------------------------------------------------------|-------------------------------------------------------|----------------------------------------------------------------------------------------------------------------------------|



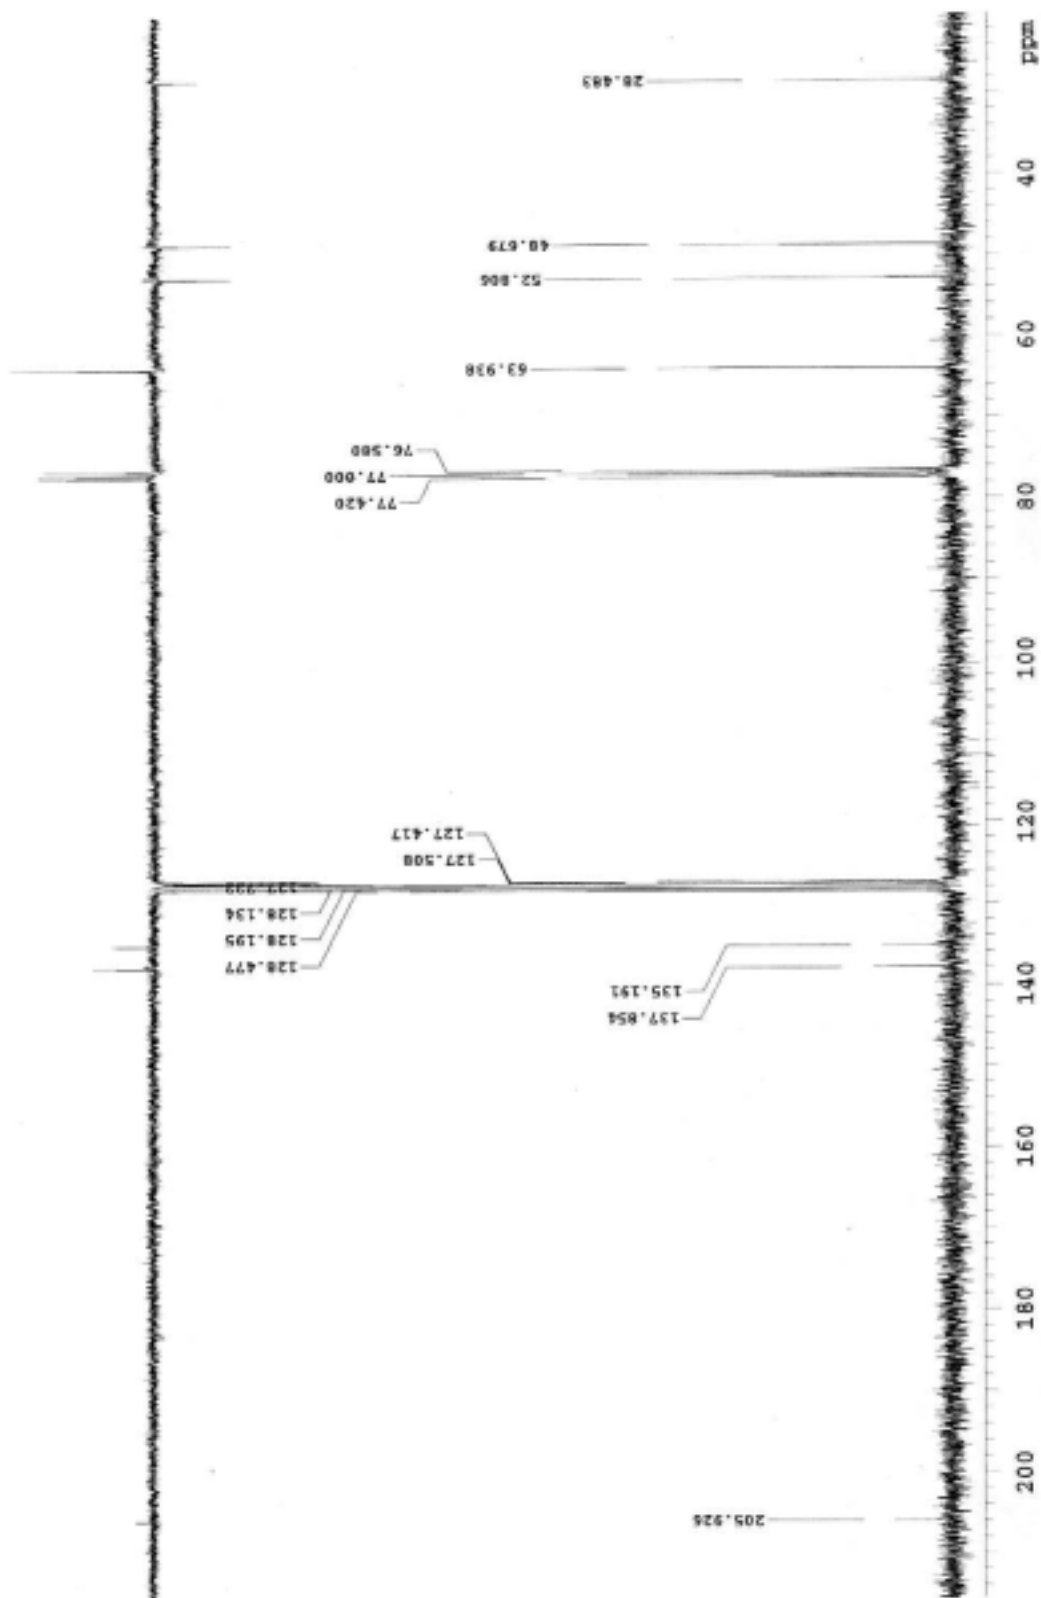

|                                                                                                                                                         |                                                                                                                                    |                                                                                                       |                                                                                        |                                                                                                                                        |
|---------------------------------------------------------------------------------------------------------------------------------------------------------|------------------------------------------------------------------------------------------------------------------------------------|-------------------------------------------------------------------------------------------------------|----------------------------------------------------------------------------------------|----------------------------------------------------------------------------------------------------------------------------------------|
| <p>PULSE SEQUENCE</p> <p>Relax. delay 0.501 sec</p> <p>Pulse 45.0 degrees</p> <p>Acq. time 1.499 sec</p> <p>Width 18865.6 Hz</p> <p>144 repetitions</p> | <p>OBSERVE C13, 75.4560949</p> <p>DECOUPLE H1, 100.0051346</p> <p>Power 16 dB</p> <p>continuously on</p> <p>WALTZ-16 modulated</p> | <p>DATA PROCESSING</p> <p>Line broadening 1.0 Hz</p> <p>FF size 65536</p> <p>Total time 4 minutes</p> | <p>Chemical structure of 2f:</p> <chem>N[C@@H](c1ccccc1)C(=O)c2ccccc2</chem> <p>2f</p> | <p>JEI-11-71B</p> <p>Pulse sequence: s2pul</p> <p>Solvent: CDCl<sub>3</sub></p> <p>Ambient temperature</p> <p>Mercury-300 "varian"</p> |
|---------------------------------------------------------------------------------------------------------------------------------------------------------|------------------------------------------------------------------------------------------------------------------------------------|-------------------------------------------------------------------------------------------------------|----------------------------------------------------------------------------------------|----------------------------------------------------------------------------------------------------------------------------------------|

10-37 A

Pulse Sequence: zgpg30

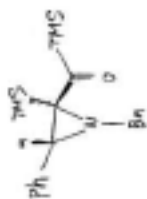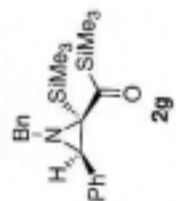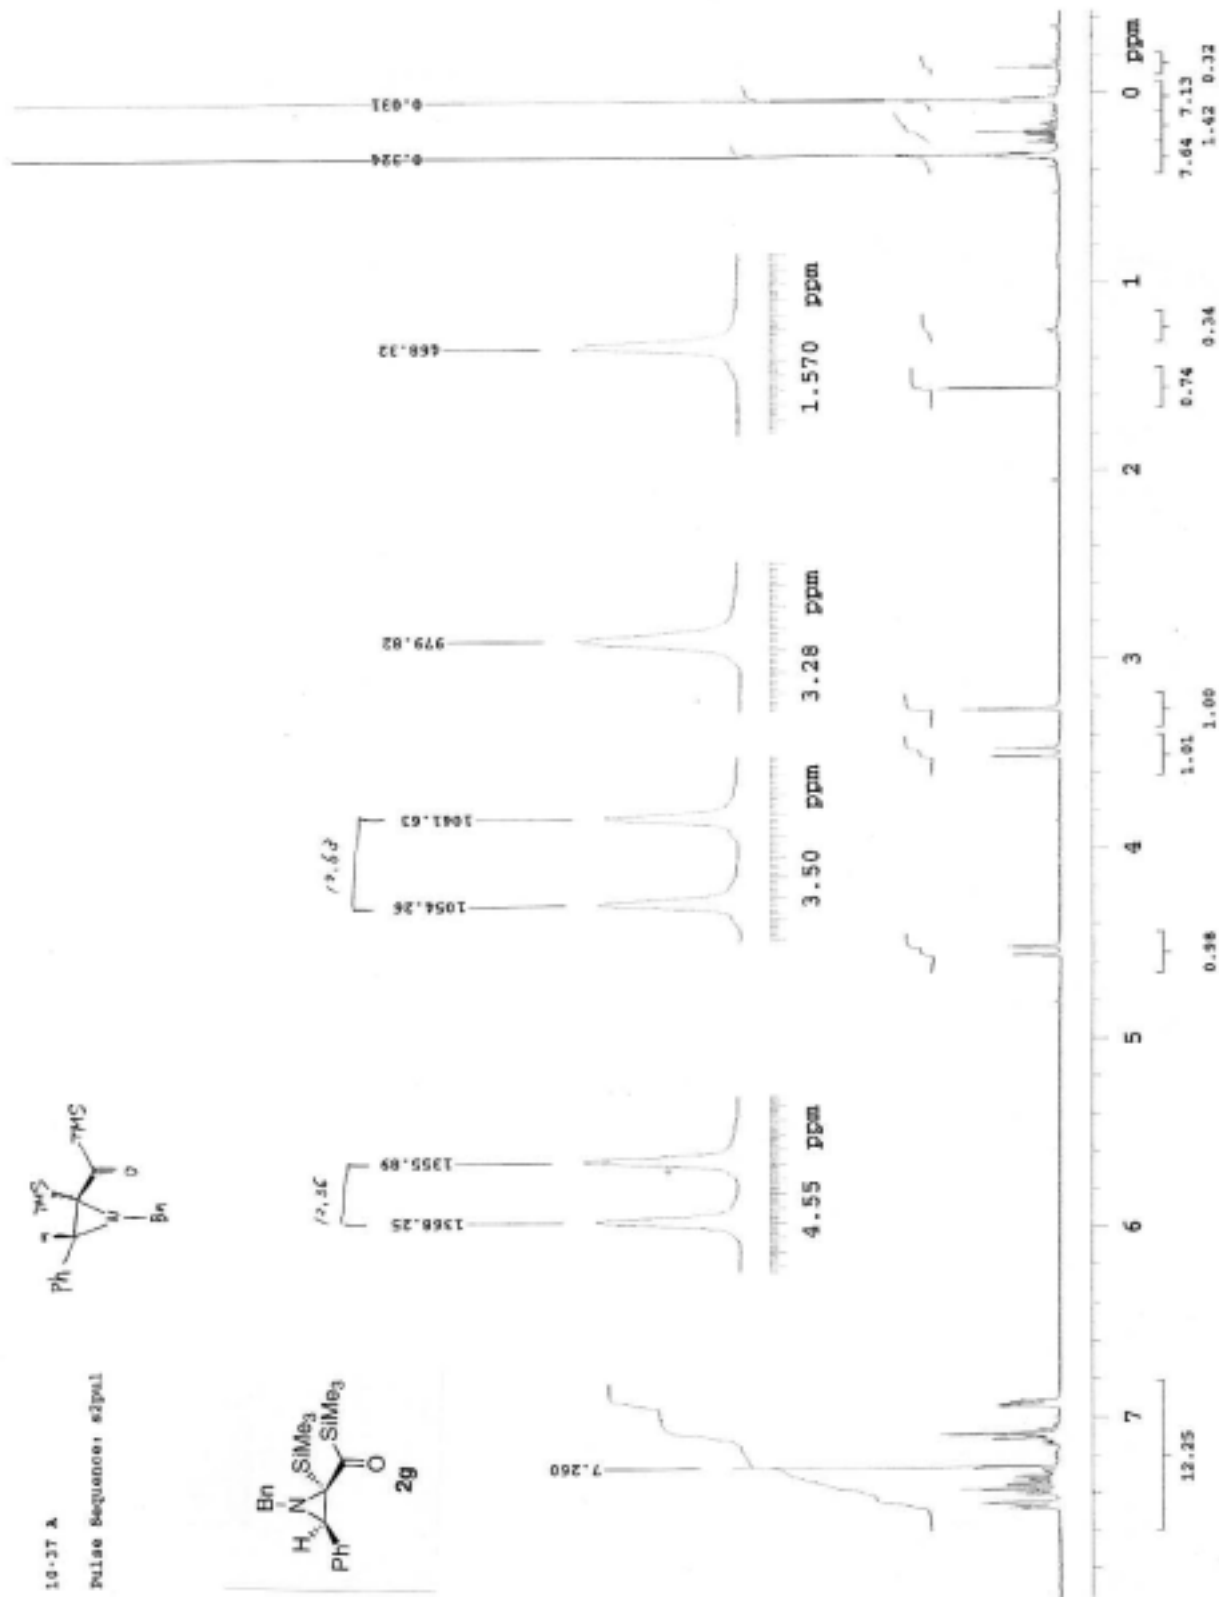

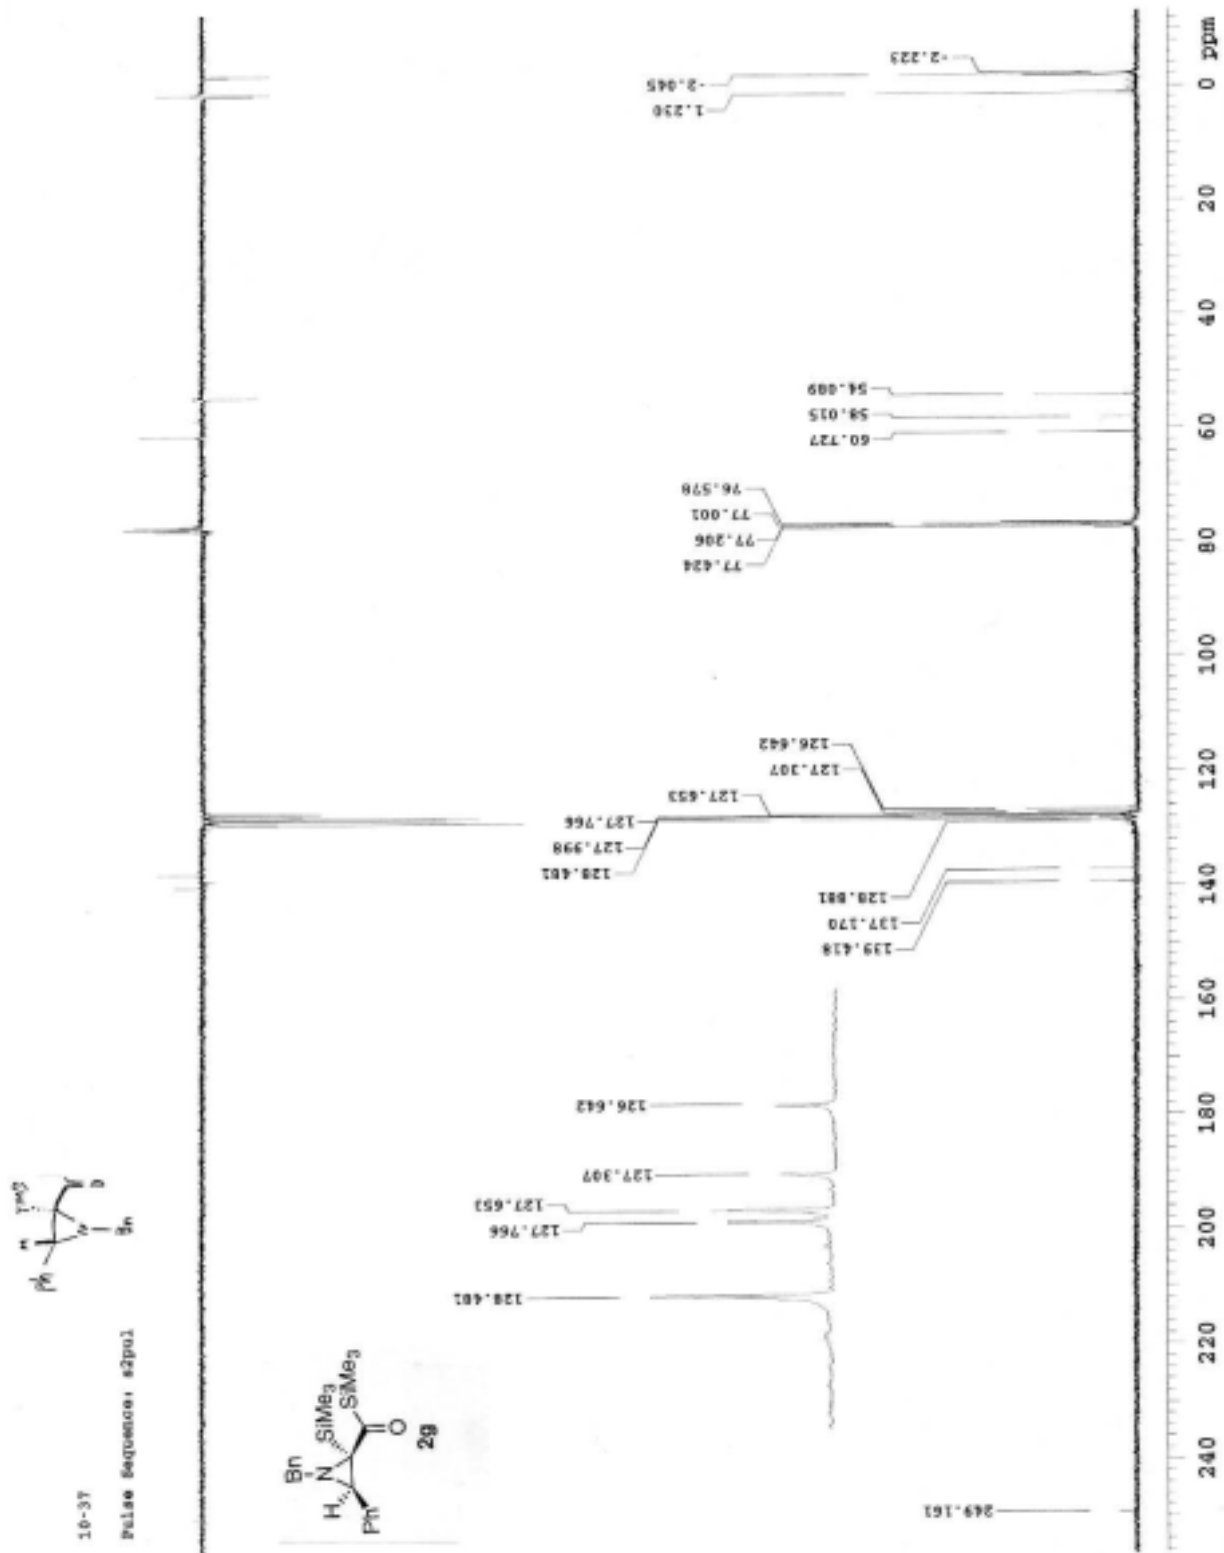



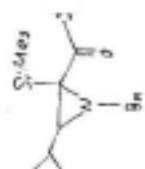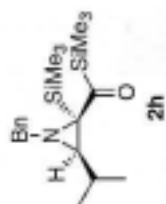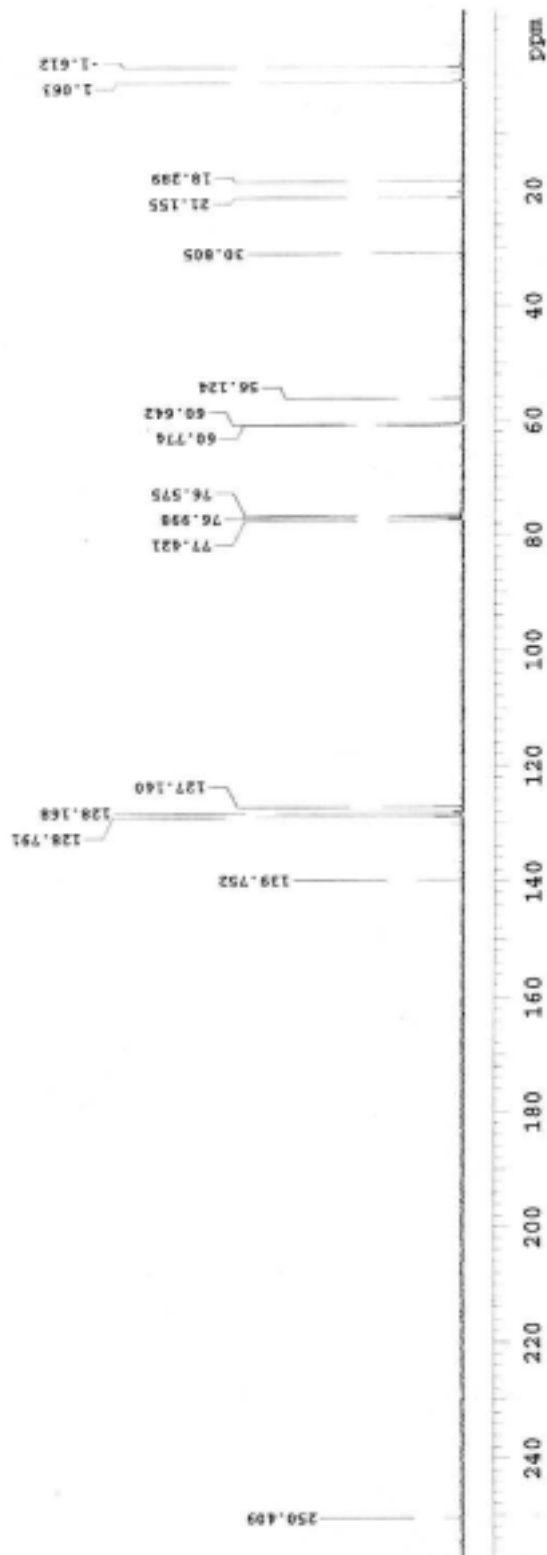



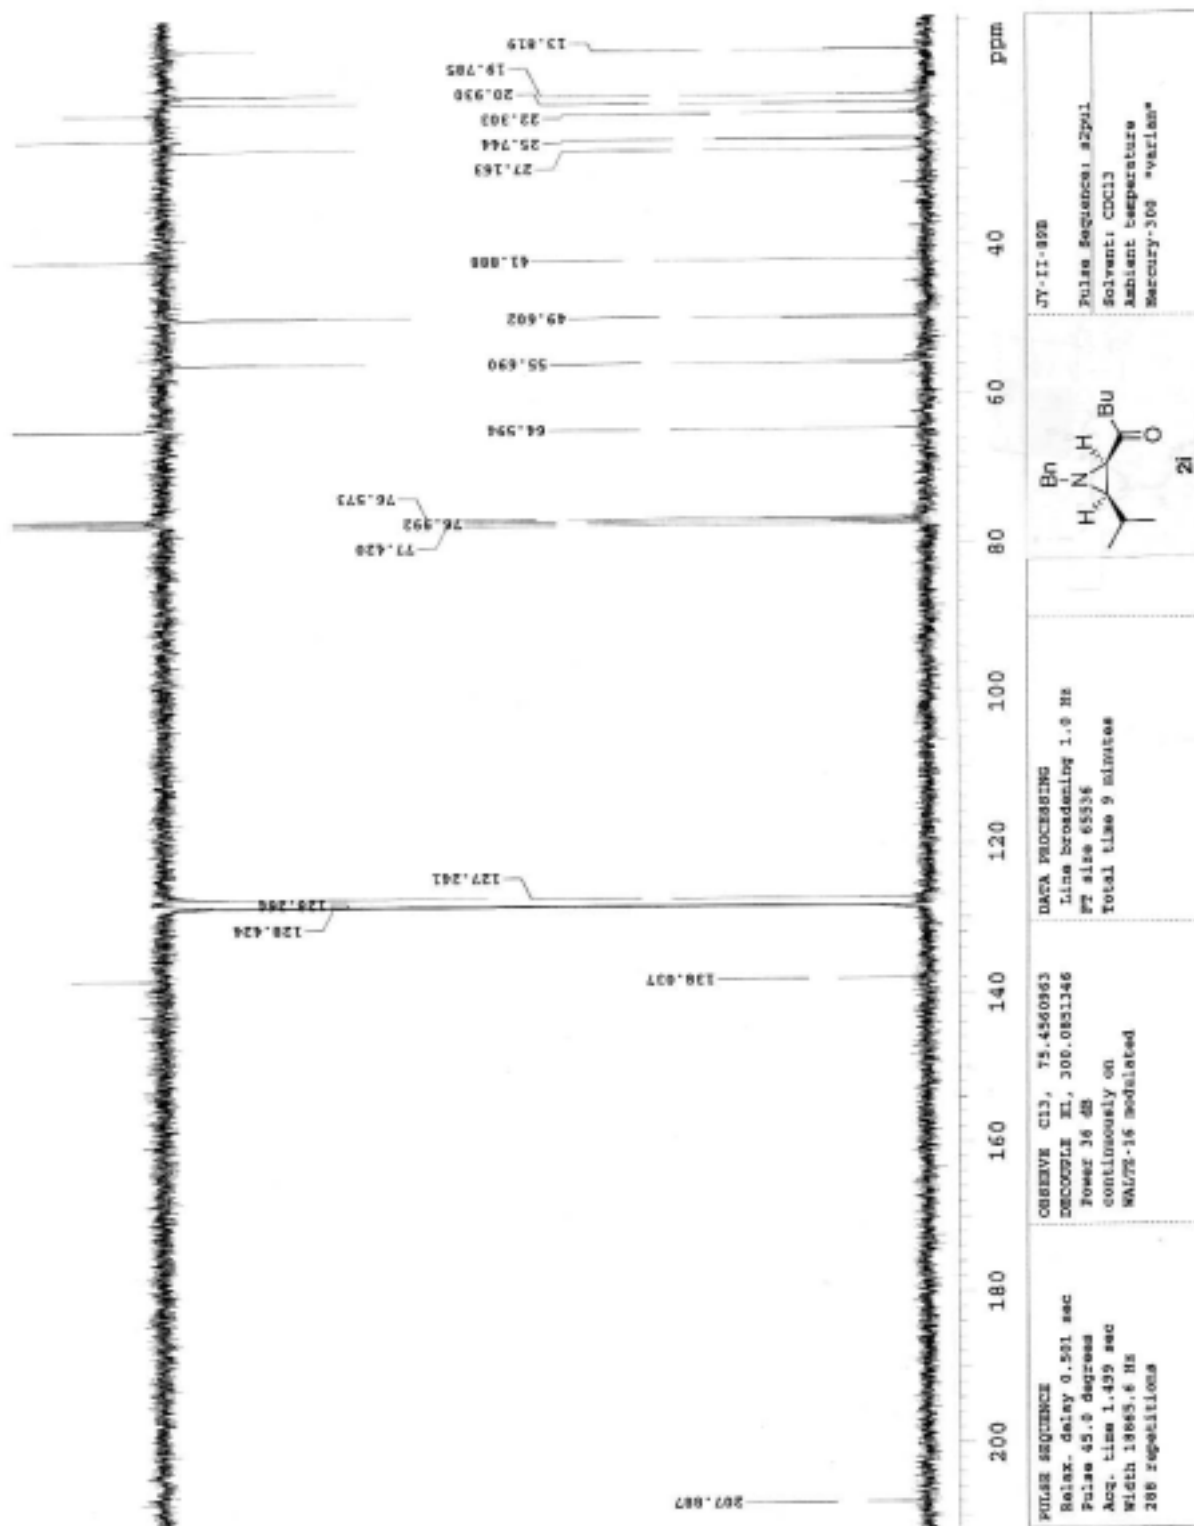



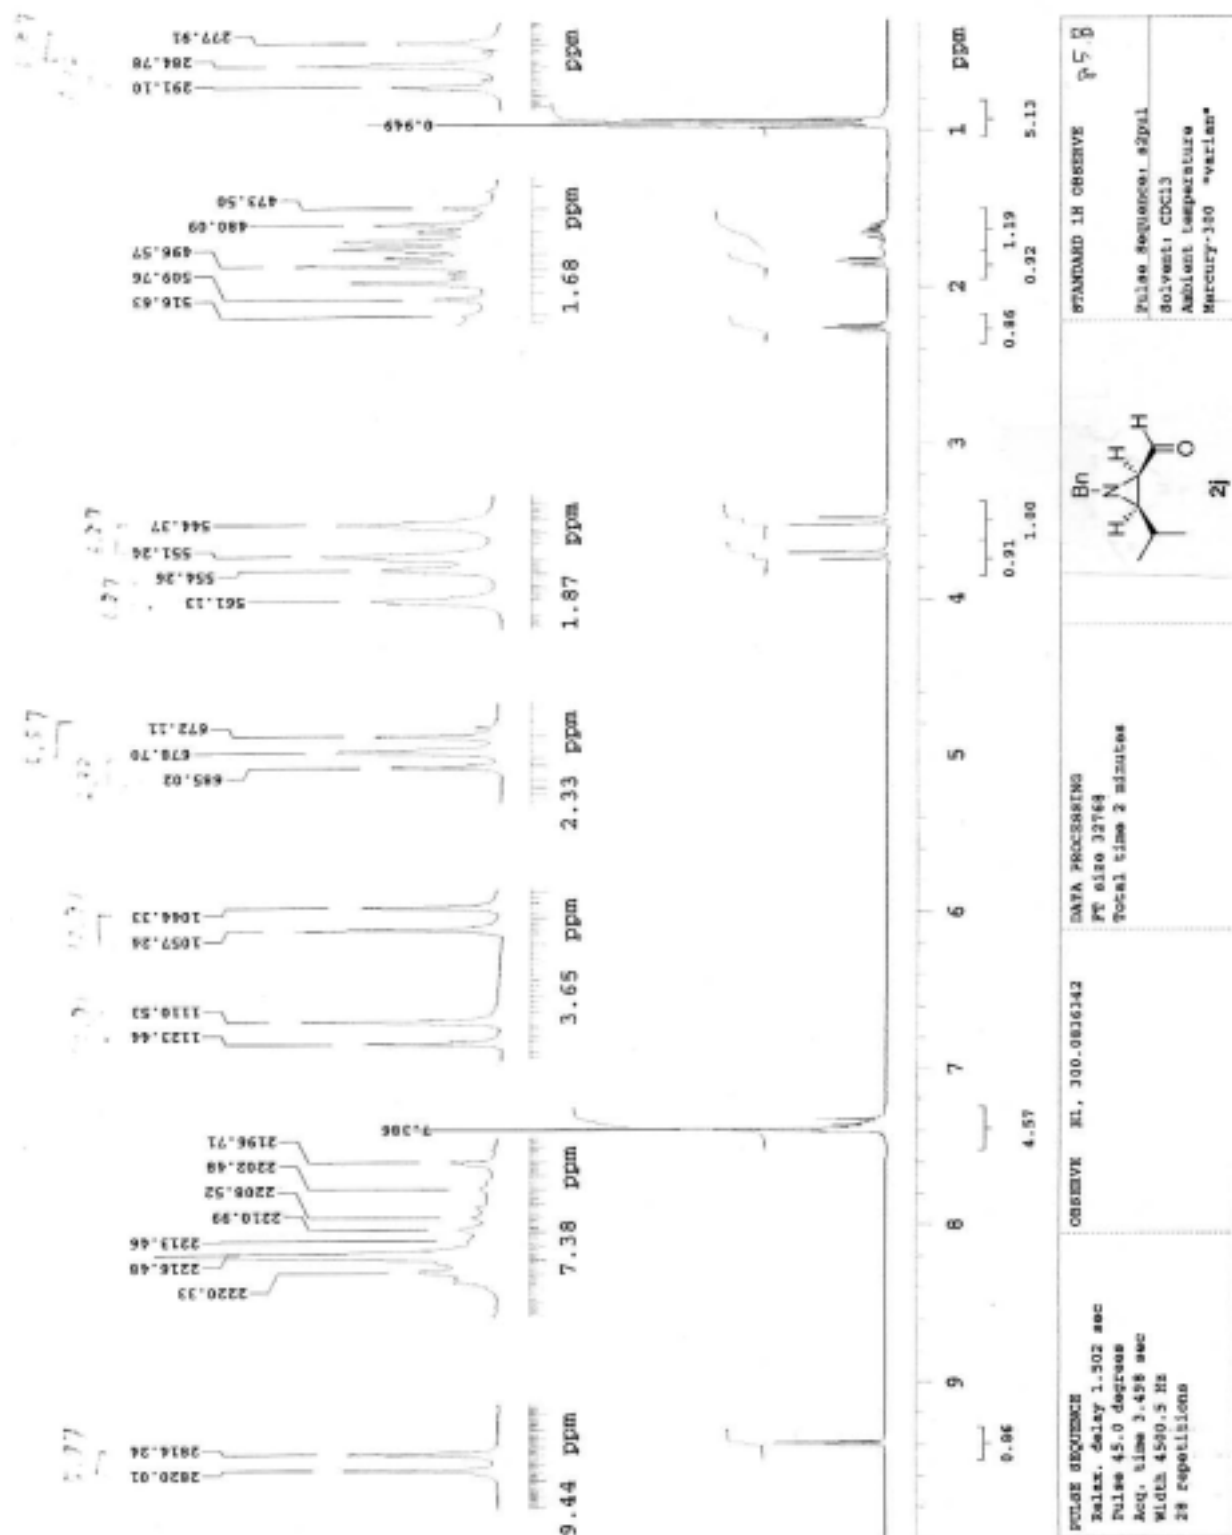

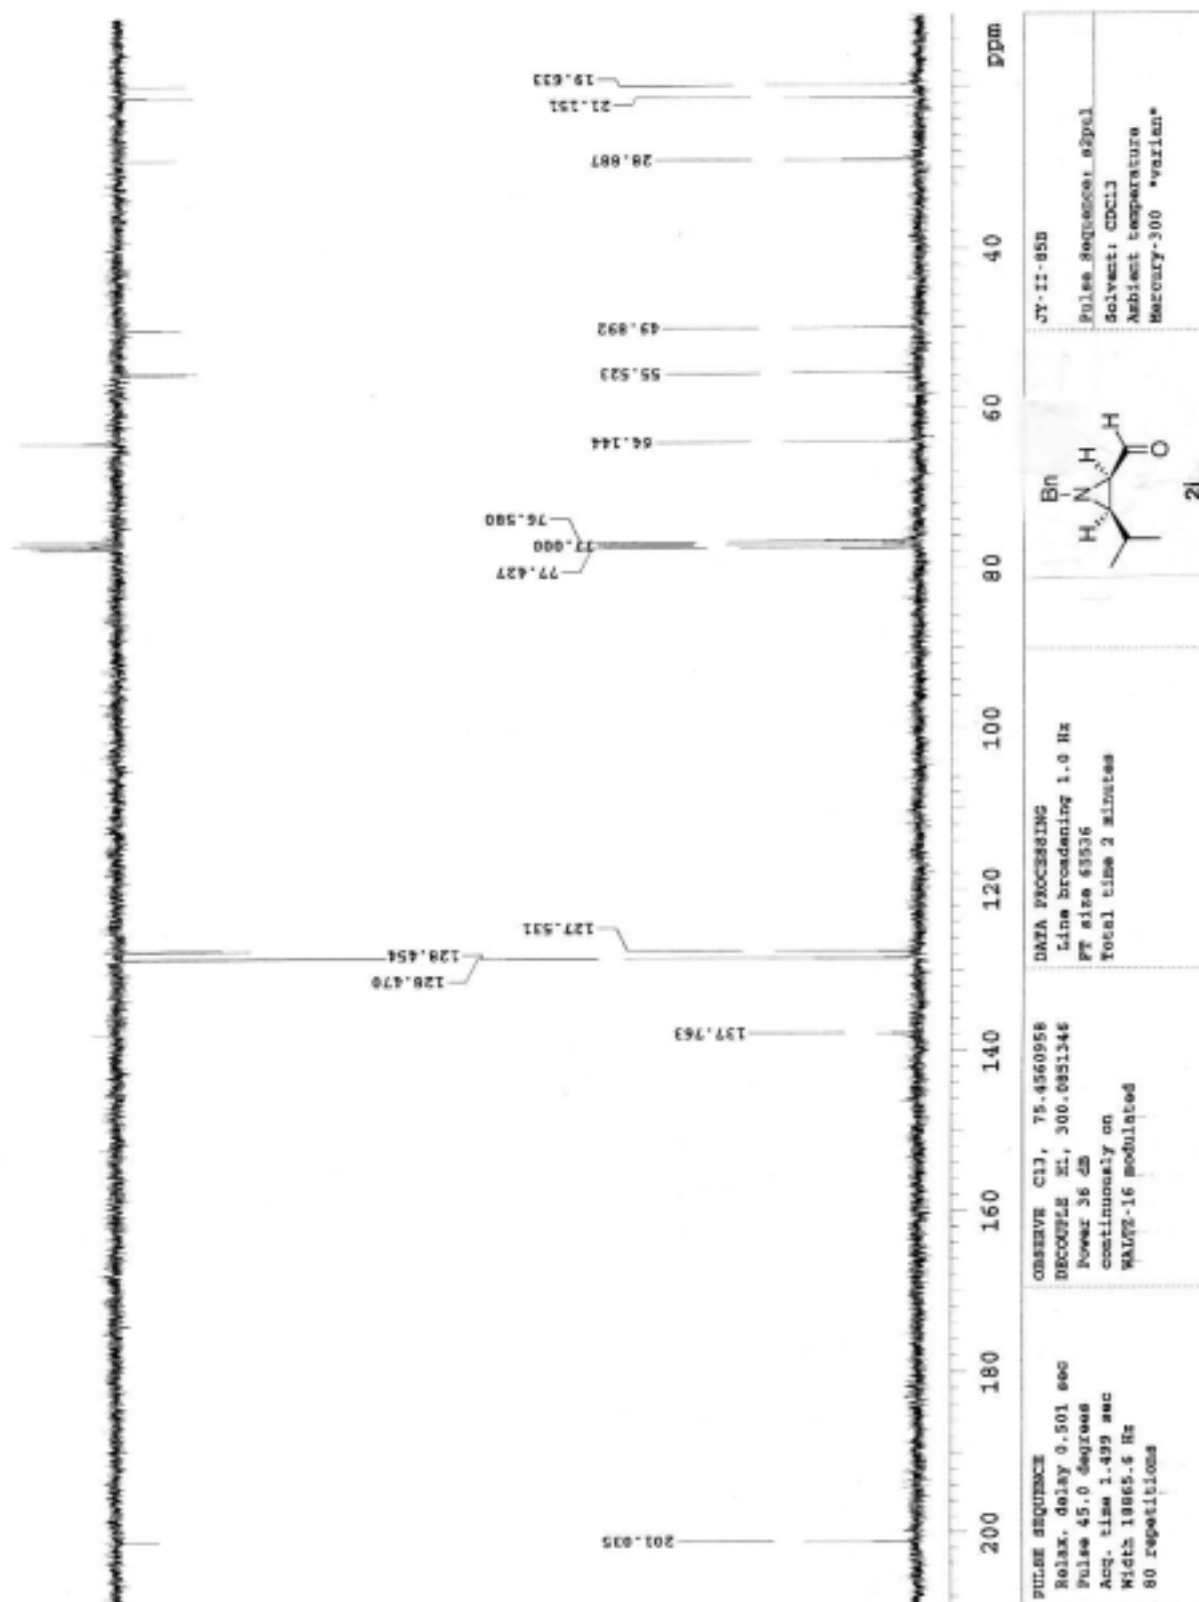

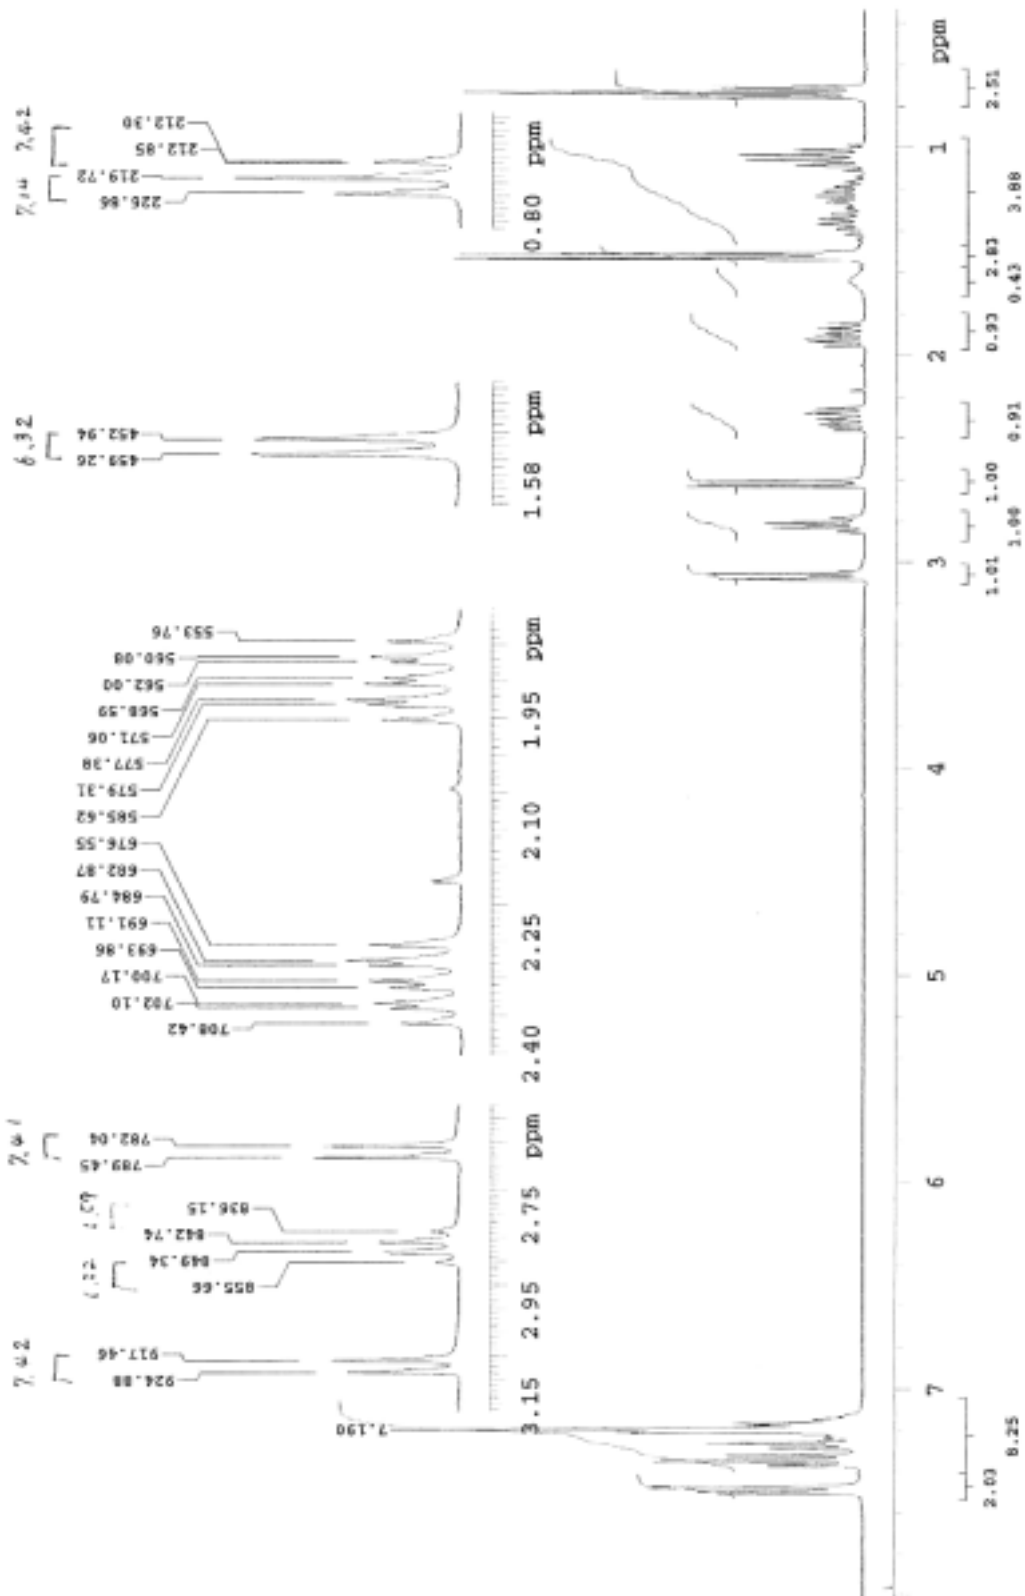

|                                                                                                                                                              |                                       |                                                                                |                                                                   |                                                                                                                              |
|--------------------------------------------------------------------------------------------------------------------------------------------------------------|---------------------------------------|--------------------------------------------------------------------------------|-------------------------------------------------------------------|------------------------------------------------------------------------------------------------------------------------------|
| <p><b>PULSE SEQUENCE</b></p> <p>Relax. delay 1.502 sec</p> <p>Pulse 45.0 degrees</p> <p>Acq. time 3.498 sec</p> <p>Width 4500.5 Hz</p> <p>28 repetitions</p> | <p><b>OBSERVE</b> H1, 300.0814525</p> | <p><b>DATA PROCESSING</b></p> <p>FT size 32768</p> <p>Total time 2 minutes</p> | <p><b>2k</b></p> <chem>C[C@H]1C(=O)N(C1Cc2ccccc2)Cc3ccccc3</chem> | <p>PT-III-128</p> <p>Pulse Sequence: e2gpi1</p> <p>Solvent: CDCl3</p> <p>Ambient temperature</p> <p>Mercury-300 "varian"</p> |
|--------------------------------------------------------------------------------------------------------------------------------------------------------------|---------------------------------------|--------------------------------------------------------------------------------|-------------------------------------------------------------------|------------------------------------------------------------------------------------------------------------------------------|

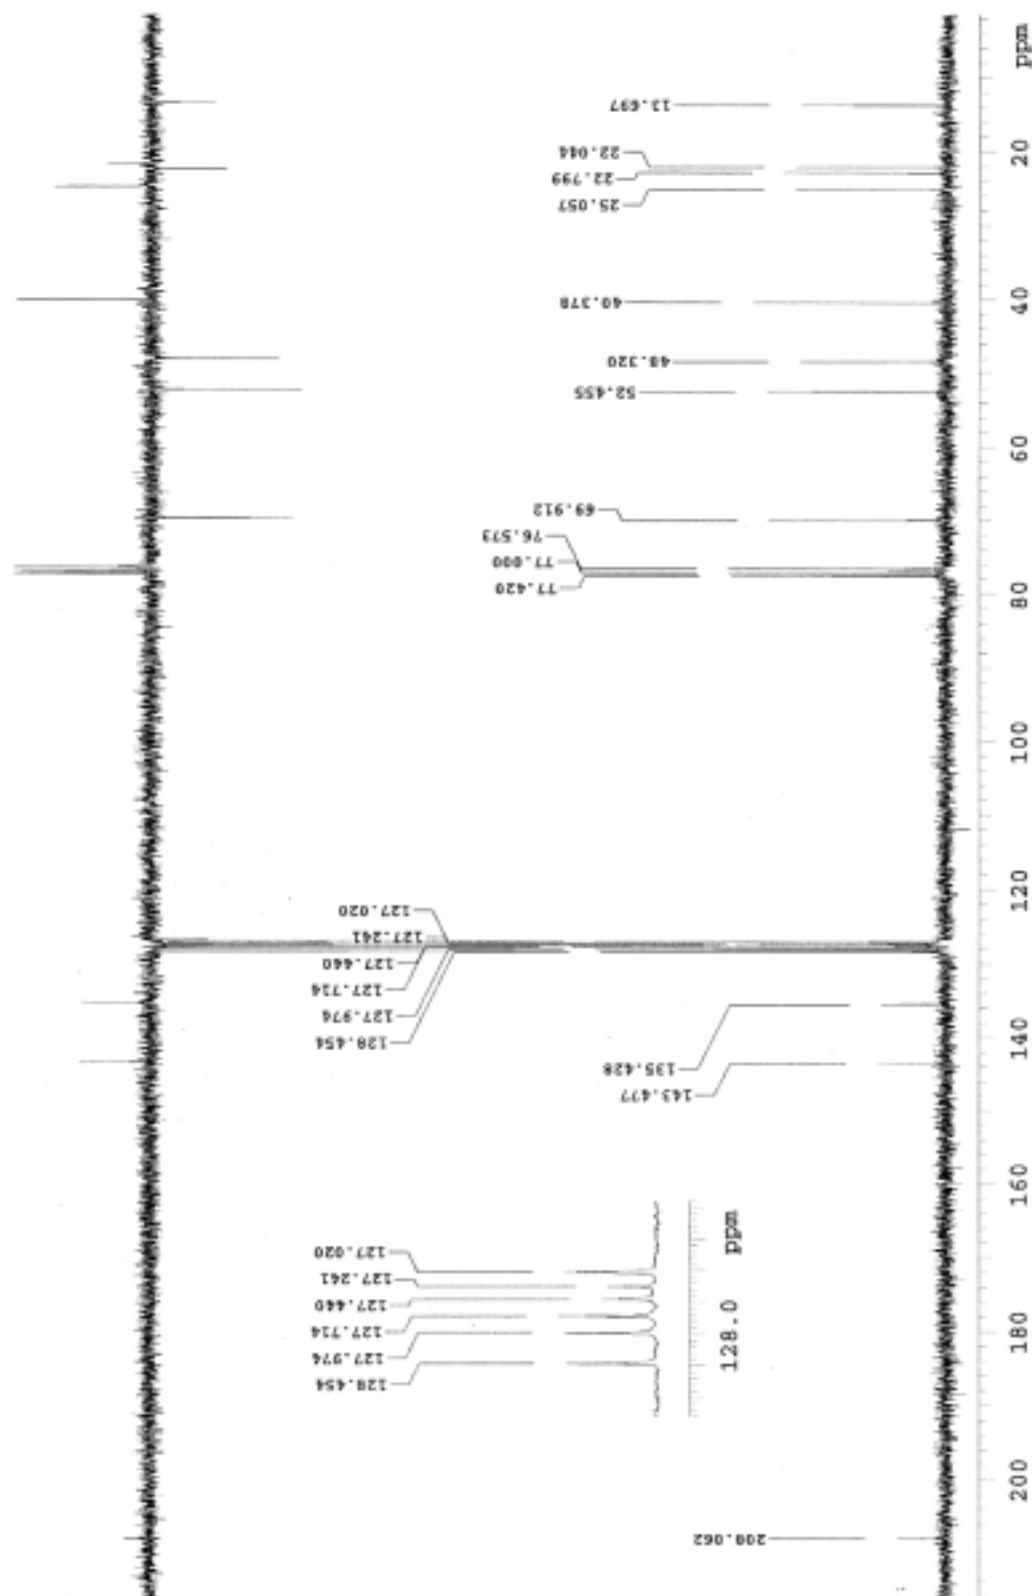

|                                                                                                                                                         |                                                                                                                                    |                                                                                                       |                                                                                               |
|---------------------------------------------------------------------------------------------------------------------------------------------------------|------------------------------------------------------------------------------------------------------------------------------------|-------------------------------------------------------------------------------------------------------|-----------------------------------------------------------------------------------------------|
| <p>PULSE SEQUENCE</p> <p>Relax. delay 0.501 sec</p> <p>Pulse 45.0 degrees</p> <p>Acq. time 1.499 sec</p> <p>Width 18865.6 Hz</p> <p>192 repetitions</p> | <p>OBSERVE C13, 75.4560846</p> <p>DECOUPLE H1, 300.0451346</p> <p>Power 36 dB</p> <p>continuously on</p> <p>WALTZ-16 modulated</p> | <p>DATA PROCESSING</p> <p>Time broadening 1.0 Hz</p> <p>PT size 65536</p> <p>Total time 6 minutes</p> | <p>Chemical structure: <chem>CC(C)C(=O)N[C@H](c1ccccc1)[C@@H](c2ccccc2)C</chem></p> <p>2k</p> |
| <p>7T-111-19B</p> <p>Pulse sequence: s2pul</p> <p>Solvent: CDCl3</p> <p>Ambient temperature</p> <p>Mercury-300 *varian*</p>                             |                                                                                                                                    |                                                                                                       |                                                                                               |



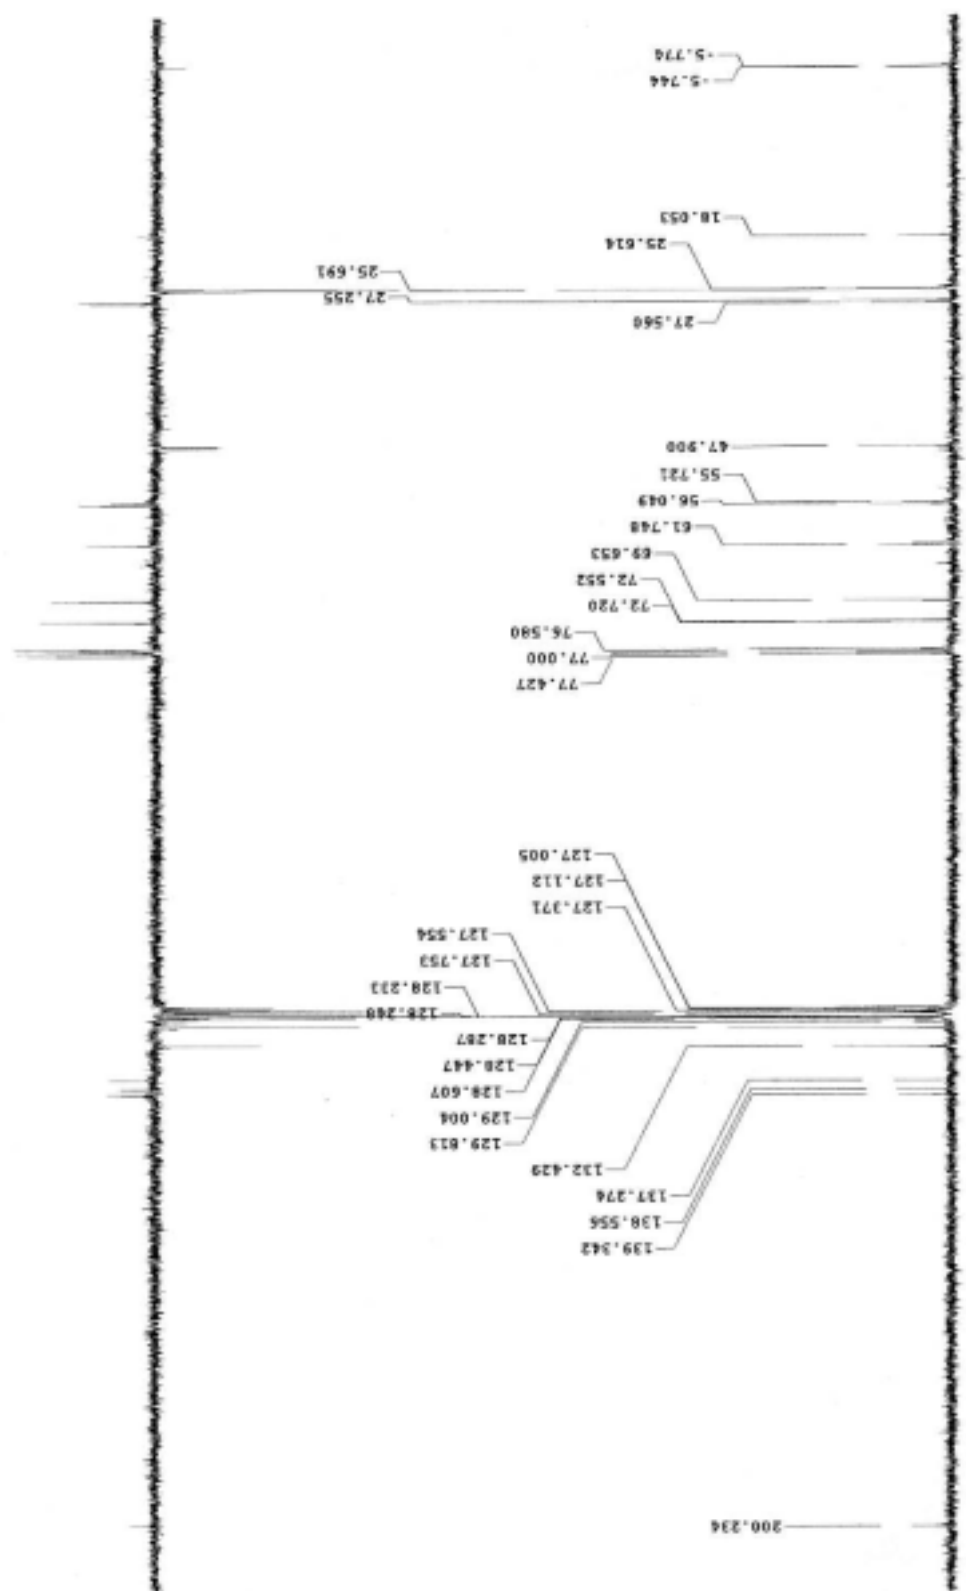

|                                                                                                                                                         |                                                                                                                                   |                                                                                                        |                                                                                                |                                                                                                                             |
|---------------------------------------------------------------------------------------------------------------------------------------------------------|-----------------------------------------------------------------------------------------------------------------------------------|--------------------------------------------------------------------------------------------------------|------------------------------------------------------------------------------------------------|-----------------------------------------------------------------------------------------------------------------------------|
| <p>PULSE SEQUENCE</p> <p>Relax. delay 0.501 sec</p> <p>Pulse 45.0 degrees</p> <p>Acq. time 1.499 sec</p> <p>Width 16645.6 Hz</p> <p>304 repetitions</p> | <p>OBSERVE C13, 75.456952</p> <p>DECOUPLE H1, 380.0651346</p> <p>Power 36 dB</p> <p>continuously on</p> <p>WALTZ-16 modulated</p> | <p>DATA PROCESSING</p> <p>Line broadening 1.0 Hz</p> <p>FT size 65536</p> <p>Total time 10 minutes</p> | <p>Chemical structure of 2l:</p> <chem>CCCCOC(=O)[C@H](c1ccccc1)N(Cc2ccccc2)C</chem> <p>2l</p> | <p>JE-III-37A</p> <p>Pulse sequence: sdpul</p> <p>Solvent: CDCl3</p> <p>Ambient temperature</p> <p>MERCURY-300 "varian"</p> |
|---------------------------------------------------------------------------------------------------------------------------------------------------------|-----------------------------------------------------------------------------------------------------------------------------------|--------------------------------------------------------------------------------------------------------|------------------------------------------------------------------------------------------------|-----------------------------------------------------------------------------------------------------------------------------|

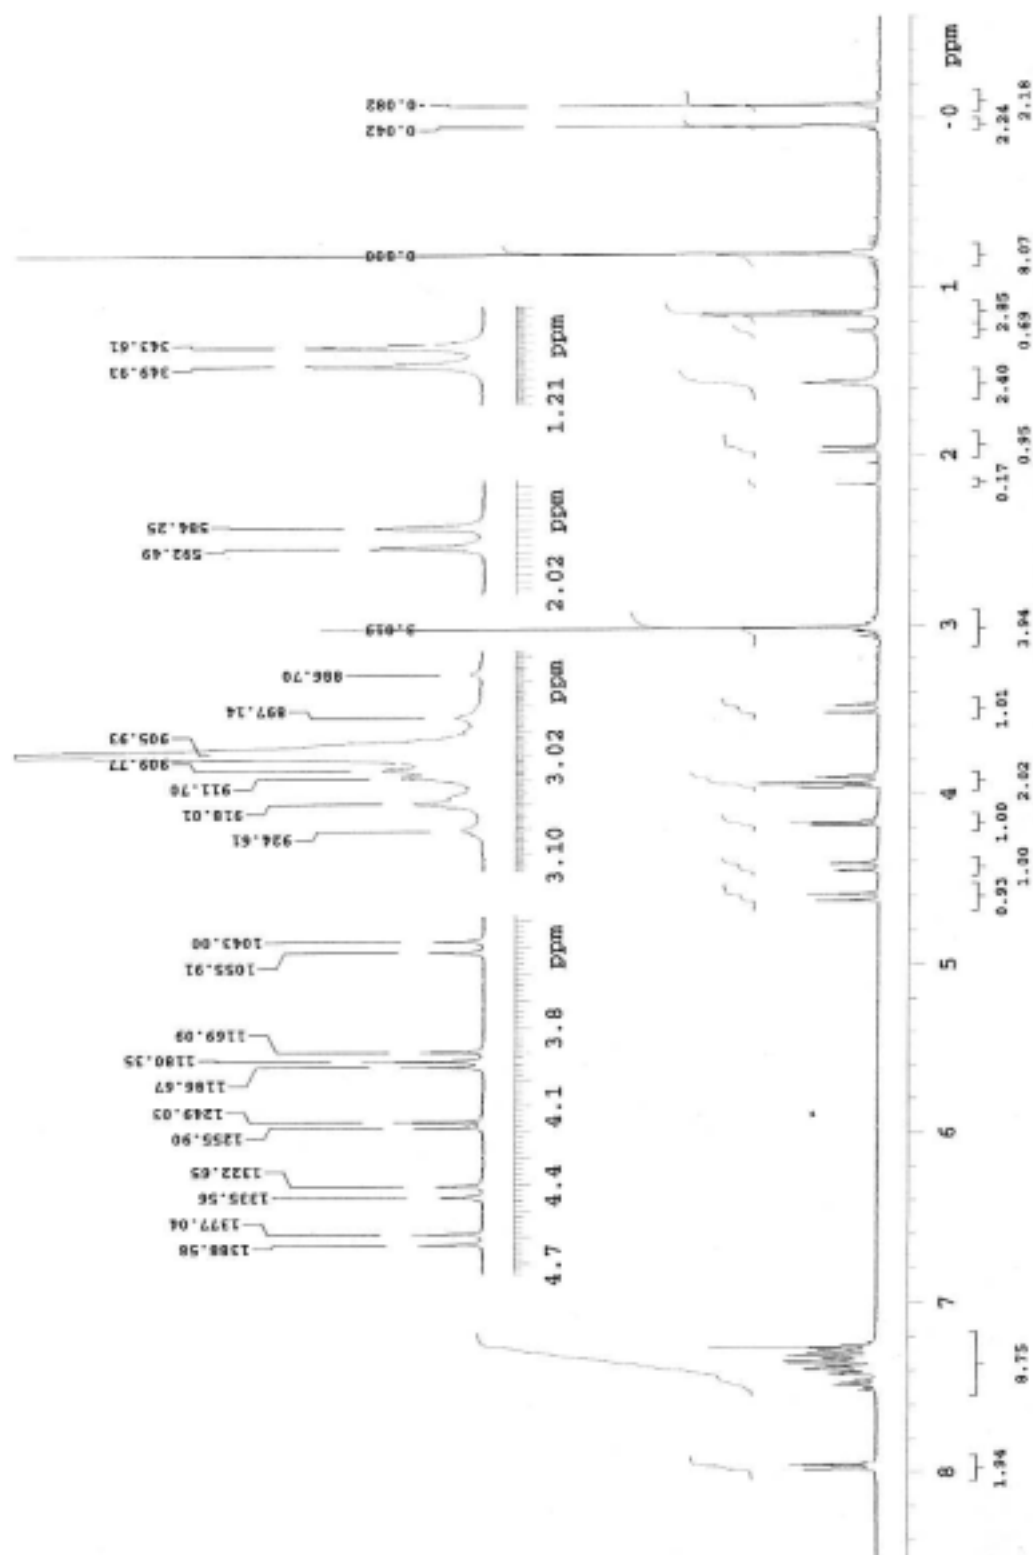

|                                                                                                                                   |                                                                                                      |                                                                                                                                         |                                            |
|-----------------------------------------------------------------------------------------------------------------------------------|------------------------------------------------------------------------------------------------------|-----------------------------------------------------------------------------------------------------------------------------------------|--------------------------------------------|
| <b>PULSE SEQUENCE</b><br>Relax. delay 1.502 sec<br>Pulse 45.0 degrees<br>Acq. time 3.438 sec<br>Width 4500.5 Hz<br>12 repetitions | <b>OBSERVE</b> H1, 300.0816523<br><br><b>DATA PROCESSING</b><br>FT size 32768<br>Total time 1 minute | <b>NAME</b> 31A<br><br><b>Pulse Sequence</b> g2pul<br><b>Solvent</b> CDCl3<br><b>Ambient temperature</b><br><b>Mercury-300</b> *varian* | <b>Chemical Structure</b><br><br><b>2m</b> |
|-----------------------------------------------------------------------------------------------------------------------------------|------------------------------------------------------------------------------------------------------|-----------------------------------------------------------------------------------------------------------------------------------------|--------------------------------------------|
